# Supplementary material for: Sublethal effects of imidacloprid on targeting muscle and ribosomal protein related genes in the honey bee Apis mellifera L
Source: PubMed Central journal article supplement (PMC5698328; doi:10.1038/s41598-017-16245-0), 2017-11-21
Supplement: 41598_2017_16245_MOESM1_ESM.pdf [file 41598_2017_16245_MOESM1_ESM.pdf]

**Supplementary information for following article**

Sublethal effects of imidacloprid on targeting muscle and ribosomal protein related genes in the honey bee *Apis mellifera* L.

Yan-Yan Wu<sup>1</sup>, Qi-Hua Luo<sup>2</sup>, Chun-Shen Hou<sup>1</sup>, Qiang Wang<sup>1</sup>, Ping-Li Dai<sup>1</sup>, Jing Gao<sup>1</sup>, Yong-Jun Liu<sup>1</sup>, Qing-Yun Diao<sup>1</sup>,

<sup>1</sup>Key Laboratory of Pollinating Insect Biology, Ministry of Agriculture, Institute of Apicultural Research, Chinese Academy of Agricultural Sciences, Beijing 100093, China

<sup>2</sup> Bureau of Landscape and Forestry, Mi Yun District, Beijing 101500, China

\*Corresponding author:

Qing-Yun Diao (Q.Y. Diao)

Key Laboratory of Pollinating Insect Biology, Ministry of Agriculture,  
Institute of Apicultural Research, Chinese Academy of Agricultural Sciences,  
Beijing 100093,  
China

Tel: +8610 62597285

Fax: +8610 62597285

Email: dqyun1@126.com

Table S1. 509 differentially expressed genes between control and imidacloprid treated groups

| Gene          | SIM_normalize   | SCK_normalize   | FoldChange      | Log <sub>2</sub> Fold Change | pval         | NR:Seq-id                       | NR:Description                                                                    |
|---------------|-----------------|-----------------|-----------------|------------------------------|--------------|---------------------------------|-----------------------------------------------------------------------------------|
| gene3<br>689  | 1003.918<br>525 | 264.3827<br>841 | 3.7972<br>15951 | 1.9249420<br>48              | 0.000<br>136 | gi 571524910 ref XP_006567203.1 | PREDICTED: venom serine protease 34 isoform X1 [Apis mellifera]                   |
| gene1<br>2324 | 125.3372<br>686 | 35.67690<br>611 | 3.5131<br>20455 | 1.8127530<br>43              | 0.000<br>349 | gi 328793159 ref XP_625207.2    | PREDICTED: phospholipase B1, membrane-associated-like isoform X3 [Apis mellifera] |
| gene6<br>640  | 4062.789<br>507 | 1436.279<br>536 | 2.8286<br>89963 | 1.5001340<br>59              | 2.24E<br>-10 | gi 118150502 ref NP_001071288.1 | chemosensory protein 1 precursor [Apis mellifera]                                 |
| gene1<br>1505 | 38.40538<br>04  | 13.61559<br>682 | 2.8206<br>90192 | 1.4960482<br>18              | 0.018<br>742 | gi 118150512 ref NP_001071293.1 | long wavelength sensitive opsin 2 [Apis mellifera]                                |
| gene6<br>088  | 213.4106<br>065 | 81.05746<br>998 | 2.6328<br>30836 | 1.3966148<br>29              | 0.007<br>057 | gi 110758297 ref XP_001120293.1 | PREDICTED: phospholipase A2-like [Apis mellifera]                                 |
| gene4<br>856  | 299.8423<br>02  | 117.1373<br>937 | 2.5597<br>48791 | 1.3560022<br>34              | 0.001<br>202 | gi 571532643 ref XP_006558886.1 | PREDICTED: uncharacterized protein LOC726672 [Apis mellifera]                     |
| gene4<br>913  | 3164.636<br>073 | 1246.956<br>822 | 2.5378<br>87452 | 1.3436280<br>91              | 0.019<br>333 | gi 58585164 ref NP_001011608.1  | alpha-glucosidase precursor [Apis mellifera]                                      |
| gene6<br>22   | 7752.783<br>798 | 3058.102<br>863 | 2.5351<br>61224 | 1.3420774<br>99              | 0.000<br>213 | gi 110749126 ref XP_394209.2    | PREDICTED: glucose dehydrogenase [FAD, quinone] isoform 3 [Apis mellifera]        |
| gene3         | 2607.675        | 1055.878        | 2.4696          | 1.3043209                    | 0.000        | gi 328789967 ref                | PREDICTED: laccase-5-like [Apis mellifera]                                        |

|               |                 |                 |                 |                 |              |                                         |                                                                         |
|---------------|-----------------|-----------------|-----------------|-----------------|--------------|-----------------------------------------|-------------------------------------------------------------------------|
| 117           | 9               | 357             | 74544           | 35              | 835          | XP_625189.2                             |                                                                         |
| gene1<br>1504 | 5489.111<br>853 | 2268.534<br>987 | 2.4196<br>72557 | 1.2748118<br>28 | 0.001<br>881 | gi 283135098 ref<br> NP_001011639.<br>2 | rhodopsin, long-wavelength [Apis mellifera]                             |
| gene9<br>572  | 49.36412<br>267 | 20.67232<br>648 | 2.3879<br>32616 | 1.2557621<br>27 | 0.003<br>714 | gi 209969890 ref<br> NP_001129681.<br>1 | silk fibroin 4 precursor [Apis mellifera]                               |
| gene4<br>229  | 38.09507<br>864 | 15.98005<br>68  | 2.3839<br>13843 | 1.2533320<br>97 | 0.031<br>971 | gi 645015869 ref<br> XP_001601386.<br>2 | PREDICTED: 40S ribosomal protein S29 [Nasonia vitripennis]              |
| gene1<br>1561 | 127.6784<br>653 | 54.42497<br>435 | 2.3459<br>53614 | 1.2301744<br>88 | 4.22E<br>-05 | gi 571574902 ref<br> XP_006563622.<br>1 | PREDICTED: uncharacterized protein LOC100576330 [Apis mellifera]        |
| gene8<br>291  | 4004.018<br>412 | 1712.763<br>153 | 2.3377<br>53709 | 1.2251229<br>44 | 0.008<br>36  | gi 66517414 ref <br>XP_623184.1         | PREDICTED: arrestin homolog isoform 2 [Apis mellifera]                  |
| gene7<br>311  | 860.7985<br>781 | 372.6899<br>935 | 2.3096<br>90609 | 1.2076996<br>11 | 0.005<br>136 | gi 820836729 ref<br> XP_012346672.<br>1 | PREDICTED: protein takeout-like [Apis florea]                           |
| gene9<br>18   | 4243.347<br>557 | 1870.714<br>798 | 2.2683<br>0277  | 1.1816132<br>22 | 0.031<br>592 | gi 66500020 ref <br>XP_397545.2         | PREDICTED: uncharacterized protein LOC409096 [Apis mellifera]           |
| gene1<br>3571 | 35.25667<br>399 | 15.55119<br>925 | 2.2671<br>35378 | 1.1808705<br>42 | 0.047<br>74  | gi 571579756 ref<br> XP_006572785.<br>1 | PREDICTED: alanine--glyoxylate aminotransferase 2-like [Apis mellifera] |
| gene7<br>564  | 1220.091<br>073 | 546.6287<br>754 | 2.2320<br>28624 | 1.1583555<br>29 | 0.000<br>162 | gi 58585118 ref <br>NP_001011589.<br>1  | odorant binding protein 4 precursor [Apis mellifera]                    |

|               |                 |                 |                 |                 |              |                                         |                                                                                   |
|---------------|-----------------|-----------------|-----------------|-----------------|--------------|-----------------------------------------|-----------------------------------------------------------------------------------|
| gene8<br>767  | 127.0497<br>722 | 58.19953<br>832 | 2.1830<br>03093 | 1.1263141<br>75 | 0.006<br>367 | gi 571558341 ref<br> XP_006564092.<br>1 | PREDICTED: pancreatic triacylglycerol lipase-like [Apis mellifera]                |
| gene1<br>1344 | 94.33901<br>449 | 43.29287<br>892 | 2.1790<br>88498 | 1.1237247<br>89 | 0.000<br>918 | gi 572298283 ref<br> XP_006615299.<br>1 | PREDICTED: uncharacterized protein LOC102672709 [Apis dorsata]                    |
| gene4<br>646  | 310.3408<br>783 | 145.4367<br>074 | 2.1338<br>55228 | 1.0934622<br>99 | 0.007<br>62  | gi 328790707 ref<br> XP_001120503.<br>2 | PREDICTED: transient receptor potential protein [Apis mellifera]                  |
| gene6<br>556  | 30.09473<br>295 | 14.22860<br>368 | 2.1150<br>86879 | 1.0807169<br>24 | 0.033<br>822 | gi 571543586 ref<br> XP_006561486.<br>1 | PREDICTED: ras-like protein family member 11B-like [Apis mellifera]               |
| gene9<br>140  | 62.24895<br>922 | 29.76868<br>756 | 2.0910<br>88467 | 1.0642540<br>99 | 0.006<br>037 | .                                       | .                                                                                 |
| gene4<br>514  | 106.5166<br>367 | 50.98274<br>518 | 2.0892<br>68366 | 1.0629978<br>18 | 0.003<br>774 | gi 110756792 ref<br> XP_001120695.<br>1 | PREDICTED: uncharacterized protein LOC726118 [Apis mellifera]                     |
| gene6<br>036  | 355.1340<br>028 | 170.7369<br>657 | 2.0800<br>06526 | 1.0565880<br>55 | 0.002<br>322 | gi 571539762 ref<br> XP_006565521.<br>1 | PREDICTED: phospholipase B1, membrane-associated-like isoform X1 [Apis mellifera] |
| gene1<br>683  | 254.9297<br>916 | 122.8177<br>222 | 2.0756<br>75946 | 1.0535812<br>28 | 0.024<br>035 | gi 218156311 ref<br> NP_001136165.<br>1 | uncharacterized protein LOC100217360 [Apis mellifera]                             |
| gene1<br>2058 | 918.2284<br>519 | 446.4724<br>505 | 2.0566<br>29588 | 1.0402819<br>79 | 0.016<br>952 | gi 58585212 ref<br>NP_001011635.<br>1   | yellow-f precursor [Apis mellifera]                                               |

|               |                 |                 |                 |                 |              |                                         |                                                                                                             |
|---------------|-----------------|-----------------|-----------------|-----------------|--------------|-----------------------------------------|-------------------------------------------------------------------------------------------------------------|
| gene1<br>0921 | 39.08923<br>73  | 19.01873<br>452 | 2.0553<br>01695 | 1.0393501<br>81 | 0.020<br>81  | gi 820852399 ref<br> XP_003694757.<br>2 | PREDICTED: uncharacterized protein LOC100869988 [Apis florea]                                               |
| gene1<br>1723 | 73.50686<br>947 | 35.88240<br>541 | 2.0485<br>49105 | 1.0346024<br>75 | 0.012<br>804 | gi 571575711 ref<br> XP_006557840.<br>1 | PREDICTED: elongation of very long chain fatty acids protein AAEL008004-like isoform X2 [Apis mellifera]    |
| gene6<br>728  | 1455.333<br>317 | 713.0494<br>787 | 2.0409<br>99062 | 1.0292755<br>19 | 0.000<br>424 | gi 328784765 ref<br> XP_624408.2        | PREDICTED: trans-1,2-dihydrobenzene-1,2-diol dehydrogenase-like [Apis mellifera]                            |
| gene1<br>0514 | 1140.489<br>415 | 567.5426<br>59  | 2.0095<br>21922 | 1.0068523<br>16 | 0.016<br>271 | gi 201023353 ref<br> NP_001128419.<br>1 | esterase A2 [Apis mellifera]                                                                                |
| gene1<br>0882 | 199.2520<br>175 | 99.87751<br>751 | 1.9949<br>63656 | 0.9963624<br>64 | 0.033<br>733 | gi 58585160 ref<br>NP_001011606.<br>1   | opsin, blue-sensitive [Apis mellifera]                                                                      |
| gene6<br>400  | 250.2774<br>917 | 125.5646<br>715 | 1.9932<br>15837 | 0.9950979<br>42 | 5.42E<br>-05 | gi 110773269 ref<br> XP_001120568.<br>1 | PREDICTED: cytochrome c oxidase subunit 7C, mitochondrial-like [Apis mellifera]                             |
| gene1<br>1045 | 776.9336<br>862 | 392.1976<br>598 | 1.9809<br>74814 | 0.9862105<br>38 | 3.16E<br>-06 | gi 94158709 ref<br>NP_001035295.<br>1   | odorant binding protein 16 precursor [Apis mellifera]                                                       |
| gene1<br>0777 | 188.2840<br>331 | 95.07633<br>037 | 1.9803<br>46026 | 0.9857525<br>35 | 0.000<br>113 | gi 328785069 ref<br> XP_001121591.<br>2 | PREDICTED: uncharacterized protein LOC725784 isoformX1 [Apis mellifera]                                     |
| gene1<br>0174 | 73.56363<br>886 | 37.36558<br>115 | 1.9687<br>54041 | 0.9772828<br>84 | 0.005<br>558 | gi 571567810 ref<br> XP_391975.4        | PREDICTED: peptidyl-prolyl cis-trans isomerase, rhodopsin-specific isozyme-like isoform X2 [Apis mellifera] |
| gene1         | 184.1792        | 93.89785        | 1.9614          | 0.9719467       | 0.000        | gi 110763495 ref                        | PREDICTED: MORN repeat-containing protein 4 [Apis mellifera]                                                |

|               |                 |                 |                 |                 |              |                                         |                                                                                          |
|---------------|-----------------|-----------------|-----------------|-----------------|--------------|-----------------------------------------|------------------------------------------------------------------------------------------|
| 1400          | 861             | 348             | 85585           | 33              | 129          | XP_393307.3                             |                                                                                          |
| gene1<br>1346 | 105.1018<br>008 | 53.82203<br>235 | 1.9527<br>65368 | 0.9655186<br>15 | 0.029<br>484 | gi 328783471 ref<br> XP_001120999.<br>2 | PREDICTED: chymotrypsin inhibitor-like isoform 1 [Apis mellifera]                        |
| gene1<br>3483 | 118.3173<br>119 | 60.69339<br>245 | 1.9494<br>2657  | 0.9630498<br>13 | 0.004<br>026 | gi 66548280 ref<br>XP_624540.1          | PREDICTED: dehydrogenase/reductase SDR family member 11-like isoform X2 [Apis mellifera] |
| gene1<br>0317 | 1179.720<br>156 | 606.6855<br>157 | 1.9445<br>33247 | 0.9594239<br>02 | 0.000<br>958 | gi 66523006 ref<br>XP_396534.2          | PREDICTED: probable cytochrome P450 6a14 isoformX1 [Apis mellifera]                      |
| gene6<br>339  | 118.4171<br>544 | 61.18218<br>154 | 1.9354<br>84342 | 0.9526946<br>36 | 0.002<br>023 | gi 572303416 ref<br> XP_006617694.<br>1 | PREDICTED: uncharacterized protein LOC102676732 [Apis dorsata]                           |
| gene5<br>72   | 833.5277<br>943 | 432.1252<br>193 | 1.9289<br>03376 | 0.9477808<br>77 | 0.000<br>354 | gi 571502919 ref<br> XP_006565388.<br>1 | PREDICTED: uncharacterized protein LOC413056 [Apis mellifera]                            |
| gene1<br>682  | 104.4473<br>239 | 54.49002<br>32  | 1.9168<br>15551 | 0.9387115<br>18 | 0.044<br>312 | gi 820859691 ref<br> XP_003697124.<br>2 | PREDICTED: tetraspanin-7-like [Apis florea]                                              |
| gene1<br>1831 | 242.1671<br>13  | 126.6310<br>374 | 1.9123<br>83551 | 0.9353719<br>02 | 0.015<br>554 | gi 328778410 ref<br> XP_001120045.<br>2 | PREDICTED: homeotic protein deformed [Apis mellifera]                                    |
| gene1<br>1347 | 55.20096<br>445 | 29.06555<br>456 | 1.8991<br>88413 | 0.9253830<br>38 | 0.036<br>417 | gi 571574368 ref<br> XP_006563415.<br>1 | PREDICTED: mucin-6-like isoform X1 [Apis mellifera]                                      |
| gene1<br>2112 | 428.9224<br>056 | 228.5108<br>154 | 1.8770<br>33281 | 0.9084542<br>3  | 4.04E<br>-05 | gi 66526281 ref<br>XP_396852.2          | PREDICTED: scavenger receptor class B member 1 [Apis mellifera]                          |
| gene8         | 410.0094        | 219.1903        | 1.8705          | 0.9034728       | 0.000        | gi 66534390 ref                         | PREDICTED: pancreatic triacylglycerol lipase-like isoform X2 [Apis mellifera]            |

|               |                 |                 |                 |                 |              |                                         |                                                                                              |
|---------------|-----------------|-----------------|-----------------|-----------------|--------------|-----------------------------------------|----------------------------------------------------------------------------------------------|
| 768           | 572             | 505             | 63445           | 99              | 127          | XP_623663.1                             |                                                                                              |
| gene1<br>3055 | 825.6577<br>386 | 441.7616<br>678 | 1.8690<br>11729 | 0.9022756<br>23 | 2.71E<br>-06 | gi 759079256 ref<br> XP_011349442.<br>1 | PREDICTED: 40S ribosomal protein S19-like isoform X1 [Cerapachys biroi]                      |
| gene5<br>792  | 1438.974<br>909 | 776.1995<br>504 | 1.8538<br>72382 | 0.8905419<br>34 | 7.32E<br>-07 | gi 307173970 gb<br> EFN64700.1          | 40S ribosomal protein S15 [Camponotus floridanus]                                            |
| gene8<br>719  | 119.5378<br>144 | 64.93917<br>443 | 1.8407<br>65847 | 0.8803061<br>22 | 0.003<br>015 | gi 571558039 ref<br> XP_006562102.<br>1 | PREDICTED: tetratricopeptide repeat protein 39C-like [Apis mellifera]                        |
| gene1<br>1350 | 1125.545<br>578 | 615.3632<br>538 | 1.8290<br>75057 | 0.8711142<br>78 | 0.015<br>569 | gi 571574380 ref<br> XP_006563420.<br>1 | PREDICTED: chymotrypsin inhibitor-like isoform X2 [Apis mellifera]                           |
| gene1<br>0988 | 857.1372<br>661 | 469.5715<br>307 | 1.8253<br>60377 | 0.8681813<br>2  | 2.12E<br>-06 | gi 571573277 ref<br> XP_006557994.<br>1 | PREDICTED: CDGSH iron-sulfur domain-containing protein 2 homolog isoform X1 [Apis mellifera] |
| gene1<br>1340 | 171.7511<br>3   | 94.40159<br>593 | 1.8193<br>66805 | 0.8634364<br>36 | 0.028<br>863 | gi 110763428 ref<br> XP_001120193.<br>1 | PREDICTED: uncharacterized protein LOC725232 [Apis mellifera]                                |
| gene1<br>3333 | 51.82689<br>664 | 28.52126<br>477 | 1.8171<br>3178  | 0.8616630<br>49 | 0.027<br>959 | gi 48097526 ref <br>XP_391912.1         | PREDICTED: alpha-tocopherol transfer protein-like [Apis mellifera]                           |
| gene1<br>1095 | 132.6212<br>46  | 73.38198<br>13  | 1.8072<br>72626 | 0.8538141<br>52 | 0.042<br>945 | gi 66548280 ref <br>XP_624540.1         | PREDICTED: dehydrogenase/reductase SDR family member 11-like isoform X2 [Apis mellifera]     |
| gene1<br>641  | 272.5564<br>694 | 151.6818<br>442 | 1.7968<br>95804 | 0.8455067<br>54 | 0.027<br>448 | gi 571510600 ref<br> XP_006571771.<br>1 | PREDICTED: uncharacterized protein LOC102654257 [Apis mellifera]                             |
| gene1         | 1021.181        | 572.6309        | 1.7833          | 0.8345619       | 9.09E        | gi 328779527 ref                        | PREDICTED: uncharacterized protein LOC552366 [Apis mellifera]                                |

|               |                 |                 |                 |                 |              |                                         |                                                                          |
|---------------|-----------------|-----------------|-----------------|-----------------|--------------|-----------------------------------------|--------------------------------------------------------------------------|
| 95            | 668             | 468             | 15543           | 99              | -06          | XP_625285.2                             |                                                                          |
| gene1<br>2553 | 78.62719<br>841 | 44.18166<br>937 | 1.7796<br>33941 | 0.8315805<br>19 | 0.016<br>661 | .                                       | .                                                                        |
| gene2<br>375  | 121.2298<br>602 | 68.12836<br>747 | 1.7794<br>32925 | 0.8314175<br>52 | 0.010<br>035 | gi 571514717 ref<br> XP_006568869.<br>1 | PREDICTED: uncharacterized protein LOC724555 isoform X1 [Apis mellifera] |
| gene8<br>822  | 536.1067<br>392 | 302.3450<br>366 | 1.7731<br>62031 | 0.8263243<br>76 | 0.002<br>126 | gi 380029575 ref<br> XP_003698444.<br>1 | PREDICTED: 60S ribosomal protein L32 [Apis florea]                       |
| gene8<br>005  | 92.50236<br>257 | 52.44422<br>398 | 1.7638<br>2365  | 0.8187063<br>25 | 0.009<br>813 | gi 328784573 ref<br> XP_001122994.<br>2 | PREDICTED: serendipity locus protein H-1-like [Apis mellifera]           |
| gene3<br>674  | 49959.67<br>741 | 28489.18<br>165 | 1.7536<br>36802 | 0.8103499<br>8  | 0.002<br>401 | gi 58585154 ref<br>NP_001011607.<br>1   | melittin precursor [Apis mellifera]                                      |
| gene1<br>1047 | 2087.784<br>93  | 1192.114<br>72  | 1.7513<br>28874 | 0.8084500<br>26 | 0.035<br>956 | gi 94158830 ref<br>NP_001035317.<br>1   | odorant binding protein 18 precursor [Apis mellifera]                    |
| gene7<br>65   | 502.4862<br>996 | 287.9221<br>767 | 1.7452<br>15688 | 0.8034053<br>47 | 7.49E<br>-05 | gi 571503975 ref<br> XP_006568688.<br>1 | PREDICTED: uncharacterized protein LOC408592 isoform X1 [Apis mellifera] |
| gene9<br>451  | 602.1048<br>77  | 346.5165<br>649 | 1.7375<br>93345 | 0.7970904<br>83 | 0.034<br>942 | gi 571563280 ref<br> XP_006558363.<br>1 | PREDICTED: facilitated trehalose transporter Tret1-like [Apis mellifera] |
| gene1<br>0415 | 569.8122<br>85  | 328.4087<br>086 | 1.7350<br>7057  | 0.7949943<br>42 | 0.012<br>279 | gi 815768511 ref<br> XP_012231503.      | PREDICTED: uncharacterized protein LOC105677458 [Linepithema humile]     |



|              |                 |                 |                 |                 |              |                                         |                                                                             |
|--------------|-----------------|-----------------|-----------------|-----------------|--------------|-----------------------------------------|-----------------------------------------------------------------------------|
|              |                 |                 |                 |                 |              | 1                                       |                                                                             |
| gene7<br>565 | 8968.287<br>148 | 5173.314<br>532 | 1.7335<br>6696  | 0.7937435<br>63 | 0.013<br>815 | gi 94158729 ref<br>NP_001035311.<br>1   | odorant binding protein 3 precursor [Apis mellifera]                        |
| gene1<br>72  | 138.2338<br>759 | 79.74826<br>056 | 1.7333<br>77943 | 0.7935862<br>52 | 0.007<br>465 | gi 572270852 ref<br> XP_006613410.<br>1 | PREDICTED: pre-mRNA-splicing factor CWC22 homolog isoform X1 [Apis dorsata] |
| gene4<br>019 | 56.93668<br>085 | 32.84762<br>473 | 1.7333<br>57627 | 0.7935693<br>42 | 0.048<br>287 | gi 328780013 ref<br> XP_003249736.<br>1 | PREDICTED: uncharacterized protein LOC100577683 [Apis mellifera]            |
| gene4<br>029 | 74.56387<br>108 | 43.04345<br>194 | 1.7322<br>93014 | 0.7926829<br>79 | 0.030<br>887 | gi 58585100 ref<br>NP_001011575.<br>1   | nicotinic acetylcholine receptor alpha8 subunit [Apis mellifera]            |
| gene5<br>376 | 484.1611<br>425 | 280.2891<br>666 | 1.7273<br>63024 | 0.7885713<br>13 | 0.001<br>927 | gi 571535759 ref<br> XP_001119990.<br>2 | PREDICTED: uncharacterized protein LOC724221 isoform 1 [Apis mellifera]     |
| gene1<br>044 | 58.53595<br>719 | 33.94581<br>154 | 1.7243<br>94102 | 0.7860895<br>33 | 0.046<br>946 | gi 733869626 ref<br> XP_010708157.<br>1 | PREDICTED: histone H3-like [Meleagris gallopavo]                            |
| gene4<br>760 | 61.93738<br>044 | 35.96915<br>12  | 1.7219<br>58355 | 0.7840502<br>52 | 0.045<br>671 | gi 380024952 ref<br> XP_003696250.<br>1 | PREDICTED: transcription and mRNA export factor ENY2 [Apis florea]          |
| gene3<br>838 | 228.0182<br>276 | 132.8743<br>782 | 1.7160<br>43609 | 0.7790862<br>16 | 0.031<br>991 | gi 571525702 ref<br> XP_006567356.<br>1 | PREDICTED: uncharacterized protein LOC102654949 [Apis mellifera]            |
| gene1        | 73.32726        | 42.76249        | 1.7147          | 0.7780037       | 0.034        | gi 571508217 ref                        | PREDICTED: uncharacterized protein LOC551357 isoform X1 [Apis mellifera]    |

|               |                 |                 |                 |                 |              |                                 |                                                                             |
|---------------|-----------------|-----------------|-----------------|-----------------|--------------|---------------------------------|-----------------------------------------------------------------------------|
| 294           | 278             | 197             | 5654            | 58              | 907          | XP_006571299.1                  |                                                                             |
| gene2<br>309  | 146.4416<br>058 | 85.79326<br>133 | 1.7069<br>12682 | 0.7713892<br>58 | 0.042<br>146 | gi 571515131 ref XP_006568941.1 | PREDICTED: soma ferritin [Apis mellifera]                                   |
| gene1<br>0274 | 1276.810<br>4   | 748.3118<br>383 | 1.7062<br>54445 | 0.7708328<br>05 | 0.000<br>994 | gi 58585144 ref NP_001011598.1  | alpha-amylase precursor [Apis mellifera]                                    |
| gene1<br>434  | 252.6413<br>77  | 148.2108<br>179 | 1.7046<br>0821  | 0.7694401<br>86 | 0.013<br>995 | gi 110766219 ref XP_001120479.1 | PREDICTED: ribonuclease kappa-like [Apis mellifera]                         |
| gene2<br>279  | 72.27949<br>484 | 42.42015<br>139 | 1.7038<br>95259 | 0.7688366<br>54 | 0.023<br>574 | gi 328789556 ref XP_003251294.1 | PREDICTED: uncharacterized protein LOC100576118 isoform X1 [Apis mellifera] |
| gene1<br>484  | 80.96610<br>154 | 47.57380<br>305 | 1.7019<br>05174 | 0.7671506<br>55 | 0.016<br>207 | gi 201023329 ref NP_001128406.1 | GABA neurotransmitter transporter-1A [Apis mellifera]                       |
| gene6<br>81   | 129.7908<br>969 | 76.56575<br>205 | 1.6951<br>56038 | 0.7614180<br>79 | 0.021<br>704 | gi 48138800 ref XP_396933.1     | PREDICTED: cell death-related nuclease 6 isoform X1 [Apis mellifera]        |
| gene1<br>1923 | 4183.135<br>548 | 2472.690<br>294 | 1.6917<br>34528 | 0.7585031<br>94 | 1.17E<br>-05 | gi 66526748 ref XP_624696.1     | PREDICTED: 60S ribosomal protein L27a isoform X2 [Apis mellifera]           |
| gene8<br>055  | 89.32091<br>513 | 52.96326<br>673 | 1.6864<br>69144 | 0.7540059<br>23 | 0.017<br>993 | gi 571553698 ref XP_006565579.1 | PREDICTED: uncharacterized protein LOC725578 isoform X1 [Apis mellifera]    |
| gene6<br>61   | 119.4236<br>047 | 70.88404<br>328 | 1.6847<br>74164 | 0.7525552<br>18 | 0.012<br>82  | gi 328788801 ref XP_001122217.1 | PREDICTED: facilitated trehalose transporter Tret1-like [Apis mellifera]    |

|               |                 |                 |                 |                 |              |                                         |                                                                               |
|---------------|-----------------|-----------------|-----------------|-----------------|--------------|-----------------------------------------|-------------------------------------------------------------------------------|
|               |                 |                 |                 |                 |              | 2                                       |                                                                               |
| gene1<br>0792 | 211.9464<br>421 | 126.4379<br>328 | 1.6762<br>88416 | 0.7452703<br>95 | 0.034<br>822 | gi 328785089 ref<br> XP_394000.3        | PREDICTED: carotenoid isomeroxygenase isoform 1 [Apis mellifera]              |
| gene7<br>304  | 2040.046<br>96  | 1225.067<br>773 | 1.6652<br>52327 | 0.7357407<br>98 | 0.001<br>374 | gi 328781001 ref<br> XP_393105.3        | PREDICTED: circadian clock-controlled protein-like isoform 1 [Apis mellifera] |
| gene2<br>111  | 94.90833<br>311 | 57.01151<br>327 | 1.6647<br>22223 | 0.7352814<br>68 | 0.047<br>875 | gi 571513290 ref<br> XP_006565983.<br>1 | PREDICTED: chaoptin-like, partial [Apis mellifera]                            |
| gene1<br>2883 | 6920.564<br>154 | 4169.694<br>29  | 1.6597<br>29388 | 0.7309480<br>36 | 0.000<br>406 | gi 110768640 ref<br> XP_001119842.<br>1 | PREDICTED: uncharacterized protein LOC724114 isoform X1 [Apis mellifera]      |
| gene1<br>1520 | 105.2494<br>48  | 63.46140<br>389 | 1.6584<br>79667 | 0.7298613<br>25 | 0.040<br>948 | gi 571575360 ref<br> XP_006563786.<br>1 | PREDICTED: enteropeptidase-like [Apis mellifera]                              |
| gene2<br>686  | 310.5977<br>176 | 187.6978<br>287 | 1.6547<br>75229 | 0.7266352<br>67 | 0.005<br>278 | gi 755959992 ref<br> XP_011304587.<br>1 | PREDICTED: 60S ribosomal protein L37a [Fopius arisanus]                       |
| gene1<br>627  | 63.63914<br>685 | 38.48005<br>969 | 1.6538<br>21417 | 0.7258034<br>58 | 0.039<br>18  | gi 571510150 ref<br> XP_006571692.<br>1 | PREDICTED: HIG1 domain family member 1B-like [Apis mellifera]                 |
| gene3<br>840  | 113.6148<br>063 | 68.82044<br>416 | 1.6508<br>87432 | 0.7232417<br>51 | 0.012<br>887 | gi 571525805 ref<br> XP_006567379.<br>1 | PREDICTED: alkylglycerol monooxygenase-like [Apis mellifera]                  |
| gene1<br>2219 | 1591.884<br>701 | 968.9893<br>872 | 1.6428<br>29862 | 0.7161830<br>76 | 0.000<br>137 | gi 328793032 ref<br> XP_003251816.<br>1 | PREDICTED: uncharacterized protein LOC100578392 [Apis mellifera]              |

|               |                 |                 |                 |                 |              |                                         |                                                                             |
|---------------|-----------------|-----------------|-----------------|-----------------|--------------|-----------------------------------------|-----------------------------------------------------------------------------|
| gene6<br>373  | 3424.826<br>568 | 2085.309<br>292 | 1.6423<br>59041 | 0.7157695<br>53 | 8.86E<br>-05 | gi 292494904 ref<br> NP_001167614.<br>1 | ribosomal protein L35 [Apis mellifera]                                      |
| gene1<br>1062 | 182.7940<br>141 | 111.3789<br>45  | 1.6411<br>9003  | 0.7147422<br>95 | 0.008<br>318 | gi 328778021 ref<br> XP_395665.4        | PREDICTED: protein brown [Apis mellifera]                                   |
| gene5<br>460  | 162.9473<br>969 | 100.0187<br>726 | 1.6291<br>68133 | 0.7041355       | 0.043<br>331 | gi 328791967 ref<br> XP_392873.4        | PREDICTED: intraflagellar transport protein 74 homolog [Apis mellifera]     |
| gene6<br>780  | 506.6409<br>439 | 312.6918<br>118 | 1.6202<br>56511 | 0.6962222<br>31 | 0.032<br>521 | gi 110758964 ref<br> XP_001121327.<br>1 | PREDICTED: regucalcin-like [Apis mellifera]                                 |
| gene3<br>264  | 16162.91<br>477 | 9983.251<br>26  | 1.6190<br>03103 | 0.6951057<br>51 | 0.004<br>329 | .                                       | .                                                                           |
| gene4<br>622  | 610.2399<br>838 | 377.7869<br>068 | 1.6153<br>021   | 0.6918040<br>08 | 0.015<br>633 | gi 66509585 ref<br>XP_395132.2          | PREDICTED: uncharacterized protein LOC411664 isoform X2 [Apis mellifera]    |
| gene6<br>926  | 3682.461<br>504 | 2281.697<br>634 | 1.6139<br>13013 | 0.6905628<br>22 | 2.32E<br>-05 | gi 48142237 ref<br>XP_397314.1          | PREDICTED: 60S ribosomal protein L31 isoform 2 [Apis mellifera]             |
| gene1<br>2255 | 2214.706<br>449 | 1372.287<br>447 | 1.6138<br>79405 | 0.6905327<br>79 | 0.038<br>978 | gi 66558893 ref<br>XP_623595.1          | PREDICTED: probable cytochrome P450 6a14 [Apis mellifera]                   |
| gene3<br>735  | 1085.352<br>191 | 673.4438<br>002 | 1.6116<br>44788 | 0.6885338<br>04 | 0.000<br>325 | gi 322788733 gb<br> EFZ14326.1          | hypothetical protein SINV_15101, partial [Solenopsis invicta]               |
| gene6<br>981  | 70.03160<br>562 | 43.58984<br>274 | 1.6066<br>03769 | 0.6840141<br>66 | 0.043<br>748 | gi 328789207 ref<br> XP_395655.4        | PREDICTED: jmjC domain-containing protein 4-like isoform 1 [Apis mellifera] |
| gene7<br>961  | 140.6766<br>141 | 87.65630<br>87  | 1.6048<br>65824 | 0.6824526<br>85 | 0.015<br>444 | gi 571553130 ref<br> XP_006562937.<br>1 | PREDICTED: uncharacterized protein LOC102656803 [Apis mellifera]            |
| gene1         | 848.5324        | 528.8873        | 1.6043          | 0.6820094       | 0.001        | gi 66552169 ref                         | PREDICTED: 60S ribosomal protein L28 [Apis mellifera]                       |

|               |                 |                 |                 |                 |              |                                         |                                                                                                     |
|---------------|-----------------|-----------------|-----------------|-----------------|--------------|-----------------------------------------|-----------------------------------------------------------------------------------------------------|
| 2807          | 418             | 265             | 72802           | 14              | 07           | XP_625152.1                             |                                                                                                     |
| gene1<br>0089 | 91.37530<br>037 | 57.07505<br>397 | 1.6009<br>67393 | 0.6789439<br>25 | 0.025<br>45  | gi 571567042 ref<br> XP_393912.3        | PREDICTED: L-threonine 3-dehydrogenase, mitochondrial-like [Apis mellifera]                         |
| gene1<br>1122 | 270.8088<br>802 | 169.5725<br>443 | 1.5970<br>09005 | 0.6753724<br>47 | 0.005<br>843 | gi 572261912 ref<br> XP_006609229.<br>1 | PREDICTED: ABC transporter F family member 4-like isoform X1 [Apis dorsata]                         |
| gene1<br>0156 | 181.7887<br>897 | 113.9685<br>764 | 1.5950<br>78183 | 0.6736271<br>4  | 0.007<br>145 | gi 571568097 ref<br> XP_006560490.<br>1 | PREDICTED: fumarylacetoacetase [Apis mellifera]                                                     |
| gene1<br>0050 | 208.8176<br>948 | 131.0258<br>685 | 1.5937<br>13495 | 0.6723922<br>96 | 0.019<br>776 | gi 571566849 ref<br> XP_006558585.<br>1 | PREDICTED: G patch domain-containing protein 4-like [Apis mellifera]                                |
| gene1<br>2212 | 144.3213<br>196 | 90.58885<br>643 | 1.5931<br>465   | 0.6718789<br>38 | 0.025<br>308 | .                                       | .                                                                                                   |
| gene4<br>740  | 151.8323<br>459 | 95.35135<br>134 | 1.5923<br>46031 | 0.6711538<br>81 | 0.021<br>231 | gi 380025726 ref<br> XP_003696619.<br>1 | PREDICTED: adenosine 3'-phospho 5'-phosphosulfate transporter 1-like [Apis florea]                  |
| gene1<br>1955 | 4973.884<br>95  | 3124.167<br>14  | 1.5920<br>67494 | 0.6709014<br>99 | 3.51E<br>-05 | gi 571576123 ref<br> XP_624943.3        | PREDICTED: 40S ribosomal protein S7 [Apis mellifera]                                                |
| gene7<br>309  | 712.4011<br>865 | 447.4915<br>237 | 1.5919<br>88113 | 0.6708295<br>64 | 0.001<br>033 | gi 110766380 ref<br> XP_001122696.<br>1 | PREDICTED: protein takeout-like [Apis mellifera]                                                    |
| gene3<br>723  | 1213.706<br>297 | 764.3367<br>455 | 1.5879<br>20905 | 0.6671390<br>53 | 0.002<br>861 | gi 571525079 ref<br> XP_392316.4        | PREDICTED: protein-L-isoaspartate(D-aspartate) O-methyltransferase-like isoform X5 [Apis mellifera] |
| gene5<br>581  | 4812.736<br>391 | 3047.206<br>045 | 1.5793<br>93162 | 0.6593703<br>49 | 0.001<br>138 | gi 48105889 ref<br>XP_393034.1          | PREDICTED: 60S ribosomal protein L7a [Apis mellifera]                                               |

|               |                 |                 |                 |                 |              |                                         |                                                                                                              |
|---------------|-----------------|-----------------|-----------------|-----------------|--------------|-----------------------------------------|--------------------------------------------------------------------------------------------------------------|
| gene1<br>769  | 236.4629<br>791 | 150.3283<br>505 | 1.5729<br>76609 | 0.6534972<br>17 | 0.029<br>966 | gi 571511216 ref<br> XP_006559166.<br>1 | PREDICTED: putative leucine-rich repeat-containing protein DDB_G0290503-like isoform X1 [Apis mellifera]     |
| gene1<br>2935 | 374.8107<br>307 | 238.7255<br>692 | 1.5700<br>48538 | 0.6508091<br>6  | 0.001<br>416 | gi 571578681 ref<br> XP_001123051.<br>2 | PREDICTED: glutamine synthetase 2 cytoplasmic-like, partial [Apis mellifera]                                 |
| gene7<br>353  | 4860.177<br>505 | 3095.711<br>634 | 1.5699<br>71005 | 0.6507379<br>15 | 0.000<br>286 | gi 571547971 ref<br> XP_006561561.<br>1 | PREDICTED: 40S ribosomal protein S8 isoform X1 [Apis mellifera]                                              |
| gene1<br>2523 | 508.7198<br>806 | 324.2436<br>817 | 1.5689<br>4308  | 0.6497930<br>13 | 0.002<br>279 | gi 110773426 ref<br> XP_001119845.<br>1 | PREDICTED: stress-associated endoplasmic reticulum protein 2-like [Apis mellifera]                           |
| gene1<br>0910 | 1045.058<br>07  | 667.1882<br>344 | 1.5663<br>61659 | 0.6474173<br>57 | 0.000<br>782 | gi 110762954 ref<br> XP_001121176.<br>1 | PREDICTED: 60S ribosomal protein L34 isoformX1 [Apis mellifera]                                              |
| gene6<br>927  | 289.4316<br>39  | 185.0682<br>429 | 1.5639<br>18447 | 0.6451652<br>83 | 0.004<br>629 | gi 66514688 ref<br>XP_624939.1          | PREDICTED: protein phosphatase 1 regulatory subunit 14C-like isoform X3 [Apis mellifera]                     |
| gene6<br>628  | 172.4100<br>579 | 110.3308<br>537 | 1.5626<br>64043 | 0.6440076<br>47 | 0.023<br>817 | gi 328783839 ref<br> XP_395385.3        | PREDICTED: 2-amino-3-ketobutyrate coenzyme A ligase, mitochondrial-like isoform X3 [Apis mellifera]          |
| gene6<br>75   | 228.6949<br>349 | 146.6946<br>01  | 1.5589<br>8672  | 0.6406086<br>39 | 0.006<br>562 | gi 110765976 ref<br> XP_623942.2        | PREDICTED: BAG family molecular chaperone regulator 2-like [Apis mellifera]                                  |
| gene7<br>830  | 4771.016<br>851 | 3062.029<br>695 | 1.5581<br>22333 | 0.6398085<br>08 | 0.000<br>392 | gi 572268139 ref<br> XP_006612127.<br>1 | PREDICTED: 60S acidic ribosomal protein P0-like [Apis dorsata]                                               |
| gene1<br>2536 | 112.1575<br>481 | 72.01196<br>702 | 1.5574<br>84856 | 0.6392181<br>35 | 0.030<br>947 | gi 110769776 ref<br> XP_001123277.      | PREDICTED: dolichyl-diphosphooligosaccharide--protein glycosyltransferase subunit DAD1-like [Apis mellifera] |

|               |                 |                 |                 |                 |              |                                         |                                                                                            |
|---------------|-----------------|-----------------|-----------------|-----------------|--------------|-----------------------------------------|--------------------------------------------------------------------------------------------|
|               |                 |                 |                 |                 |              | 1                                       |                                                                                            |
| gene8<br>178  | 3302.244<br>223 | 2120.849<br>01  | 1.5570<br>38812 | 0.6388049<br>07 | 0.000<br>388 | gi 297591983 ref<br> NP_001172073.<br>1 | 60S acidic ribosomal protein P1 [Apis mellifera]                                           |
| gene5<br>501  | 2407.637<br>324 | 1549.273<br>432 | 1.5540<br>42866 | 0.6360262<br>99 | 0.000<br>513 | gi 48104663 ref<br>XP_392962.1          | PREDICTED: receptor of activated protein kinase C 1 isoformX1 [Apis mellifera]             |
| gene5<br>872  | 205.6179<br>247 | 132.3768<br>627 | 1.5532<br>76914 | 0.6353150<br>52 | 0.014<br>82  | gi 383855926 ref<br> XP_003703461.<br>1 | PREDICTED: 60S ribosomal protein L29-1 [Megachile rotundata]                               |
| gene6<br>733  | 214.1447<br>796 | 137.9364<br>547 | 1.5524<br>88645 | 0.6345827<br>16 | 0.011<br>467 | gi 66514532 ref<br>XP_624335.1          | PREDICTED: guanine nucleotide-binding protein subunit beta-2-like [Apis mellifera]         |
| gene4<br>916  | 208.6058<br>852 | 134.5900<br>447 | 1.5499<br>35477 | 0.6322081<br>58 | 0.022<br>409 | gi 328780683 ref<br> XP_001121779.<br>2 | PREDICTED: UDP-glucuronosyltransferase 2C1-like [Apis mellifera]                           |
| gene1<br>0905 | 795.9347<br>489 | 513.7851<br>316 | 1.5491<br>58782 | 0.6314850<br>22 | 0.001<br>858 | gi 571572991 ref<br> XP_006565801.<br>1 | PREDICTED: ATP synthase subunit d, mitochondrial [Apis mellifera]                          |
| gene1<br>1421 | 4588.458<br>448 | 2962.781<br>73  | 1.5486<br>99454 | 0.6310571<br>97 | 0.000<br>268 | gi 66525285 ref<br>XP_392071.2          | PREDICTED: 60S ribosomal protein L4 isoform 1 [Apis mellifera]                             |
| gene1<br>0316 | 1107.689<br>082 | 715.3997<br>65  | 1.5483<br>49798 | 0.6307314<br>38 | 0.000<br>873 | gi 571568772 ref<br> XP_006565136.<br>1 | PREDICTED: uncharacterized protein LOC724946 [Apis mellifera]                              |
| gene5<br>578  | 538.5641<br>202 | 348.0574<br>701 | 1.5473<br>42512 | 0.6297925<br>8  | 0.023<br>084 | gi 66547599 ref<br>XP_623499.1          | PREDICTED: selection and upkeep of intraepithelial T-cells protein 2-like [Apis mellifera] |
| gene1<br>2634 | 2229.472<br>419 | 1445.390<br>181 | 1.5424<br>70987 | 0.6252433<br>54 | 0.001<br>234 | gi 380023818 ref<br> XP_003695708.      | PREDICTED: 60S ribosomal protein L12 [Apis florea]                                         |

|               |                 |                 |                 |                 |              |                                         |                                                                      |
|---------------|-----------------|-----------------|-----------------|-----------------|--------------|-----------------------------------------|----------------------------------------------------------------------|
|               |                 |                 |                 |                 |              | 1                                       |                                                                      |
| gene1<br>59   | 6613.180<br>983 | 4288.531<br>006 | 1.5420<br>62066 | 0.6248608<br>33 | 0.000<br>635 | gi 110767080 ref<br> XP_001120419.<br>1 | PREDICTED: 40S ribosomal protein S6-like [Apis mellifera]            |
| gene8<br>665  | 100.8168<br>581 | 65.39677<br>75  | 1.5416<br>18134 | 0.6244454<br>47 | 0.036<br>965 | gi 571557896 ref<br> XP_006559087.<br>1 | PREDICTED: uncharacterized protein LOC551609 [Apis mellifera]        |
| gene4<br>123  | 2453.098<br>591 | 1595.197<br>363 | 1.5378<br>02562 | 0.6208702<br>88 | 0.000<br>481 | gi 572272221 ref<br> XP_006614024.<br>1 | PREDICTED: 40S ribosomal protein S11-like isoform X1 [Apis dorsata]  |
| gene1<br>2761 | 512.9703<br>758 | 333.9740<br>527 | 1.5359<br>58772 | 0.6191394<br>92 | 0.002<br>126 | gi 572316891 ref<br> XP_006624058.<br>1 | PREDICTED: opsin, ultraviolet-sensitive-like [Apis dorsata]          |
| gene3<br>15   | 210.9857<br>635 | 137.5455<br>267 | 1.5339<br>34025 | 0.6172364<br>33 | 0.009<br>767 | gi 571501317 ref<br> XP_006562598.<br>1 | PREDICTED: eyes absent homolog 4 isoform X1 [Apis mellifera]         |
| gene1<br>0549 | 6640.047<br>713 | 4334.924<br>239 | 1.5317<br>56346 | 0.6151868<br>29 | 0.000<br>668 | gi 66524293 ref <br>XP_393965.2         | PREDICTED: 40S ribosomal protein SA [Apis mellifera]                 |
| gene9<br>835  | 3515.794<br>923 | 2295.783<br>193 | 1.5314<br>14174 | 0.6148645<br>15 | 0.030<br>337 | gi 571565205 ref<br> XP_006566903.<br>1 | PREDICTED: cytochrome P450 6AQ1 isoform X1 [Apis mellifera]          |
| gene5<br>558  | 150.9899<br>175 | 98.80574<br>639 | 1.5281<br>49151 | 0.6117853<br>61 | 0.022<br>225 | gi 328791922 ref<br> XP_395661.4        | PREDICTED: transcriptional adapter 1-like isoform 1 [Apis mellifera] |
| gene7<br>95   | 2379.977<br>355 | 1558.660<br>928 | 1.5269<br>37201 | 0.6106407<br>29 | 0.000<br>95  | gi 805784468 ref<br> XP_003703131.<br>2 | PREDICTED: 60S ribosomal protein L9 [Megachile rotundata]            |



|               |                 |                 |                 |                 |              |                                         |                                                                               |
|---------------|-----------------|-----------------|-----------------|-----------------|--------------|-----------------------------------------|-------------------------------------------------------------------------------|
| gene3<br>323  | 134.6853<br>094 | 88.39353<br>334 | 1.5237<br>00935 | 0.6075797<br>65 | 0.036<br>614 | gi 571522164 ref<br> XP_623316.3        | PREDICTED: cell division cycle protein 16 homolog isoform X2 [Apis mellifera] |
| gene1<br>560  | 109.3595<br>296 | 71.81670<br>235 | 1.5227<br>58996 | 0.6066876<br>27 | 0.049<br>548 | gi 118150500 ref<br> NP_001071287.<br>1 | chemosensory protein 6 precursor [Apis mellifera]                             |
| gene1<br>0647 | 5327.139<br>446 | 3504.063<br>774 | 1.5202<br>74684 | 0.6043320<br>14 | 0.000<br>892 | gi 66551967 ref<br>XP_624896.1          | PREDICTED: 60S ribosomal protein L13 isoform 1 [Apis mellifera]               |
| gene1<br>0797 | 2393.566<br>045 | 1575.001<br>743 | 1.5197<br>22791 | 0.6038081<br>89 | 0.001<br>877 | gi 110762813 ref<br> XP_625009.2        | PREDICTED: 60S ribosomal protein L22 isoform 1 [Apis mellifera]               |
| gene3<br>414  | 3586.784<br>712 | 2368.188<br>378 | 1.5145<br>69004 | 0.5989073<br>09 | 0.002<br>158 | gi 156554296 ref<br> XP_001602465.<br>1 | PREDICTED: 40S ribosomal protein S14 [Nasonia vitripennis]                    |
| gene3<br>87   | 2204.721<br>783 | 1459.620<br>292 | 1.5104<br>76248 | 0.5950034<br>98 | 0.000<br>74  | gi 571501696 ref<br> XP_006563278.<br>1 | PREDICTED: 60S ribosomal protein L10a [Apis mellifera]                        |
| gene1<br>1506 | 377.0098<br>466 | 249.9222<br>387 | 1.5085<br>08601 | 0.5931229<br>22 | 0.007<br>848 | gi 66525117 ref<br>XP_625185.1          | PREDICTED: prefoldin subunit 6-like isoform X2 [Apis mellifera]               |
| gene2<br>03   | 546.6532<br>49  | 362.5128<br>886 | 1.5079<br>55348 | 0.5925937<br>1  | 0.004<br>989 | gi 572272330 ref<br> XP_006614075.<br>1 | PREDICTED: uncharacterized protein LOC102676956 [Apis dorsata]                |
| gene5<br>557  | 370.7927<br>7   | 246.3909<br>339 | 1.5048<br>96159 | 0.5896639<br>41 | 0.006<br>421 | gi 66564836 ref<br>XP_624899.1          | PREDICTED: AP-3 complex subunit mu-1-like isoform X2 [Apis mellifera]         |
| gene7<br>437  | 368.7736<br>118 | 245.1387<br>924 | 1.5043<br>46204 | 0.5891366<br>21 | 0.010<br>134 | gi 571549345 ref<br> XP_006561839.<br>1 | PREDICTED: probable elongation factor 1-delta isoform X1 [Apis mellifera]     |
| gene5         | 1736.076        | 1154.644        | 1.5035          | 0.5883813       | 0.008        | gi 58585214 ref                         | FABP-like protein [Apis mellifera]                                            |

|              |                 |                 |                 |                  |              |                                     |                                                                                                      |
|--------------|-----------------|-----------------|-----------------|------------------|--------------|-------------------------------------|------------------------------------------------------------------------------------------------------|
| 01           | 667             | 95              | 5888            | 65               | 493          | NP_001011636.1                      |                                                                                                      |
| gene3<br>500 | 3250.027<br>054 | 2162.707<br>953 | 1.5027<br>58174 | 0.5876128<br>67  | 0.001<br>585 | gi 571523338 ref<br> XP_006562063.1 | PREDICTED: ribosome biogenesis protein NSA2 homolog isoform X1 [Apis mellifera]                      |
| gene7<br>763 | 5586.913<br>719 | 3718.362<br>951 | 1.5025<br>19736 | 0.5873839<br>41  | 0.001<br>188 | gi 571551848 ref<br> XP_006560185.1 | PREDICTED: peroxisomal hydratase-dehydrogenase-epimerase-like [Apis mellifera]                       |
| gene7<br>324 | 2895.001<br>686 | 1927.235<br>422 | 1.5021<br>52592 | 0.5870313<br>73  | 0.001<br>351 | gi 571548748 ref<br> XP_006561728.1 | PREDICTED: 60S ribosomal protein L35a isoform X1 [Apis mellifera]                                    |
| gene2<br>92  | 5213.762<br>025 | 3472.328<br>928 | 1.5015<br>1732  | 0.5864211<br>16  | 0.000<br>959 | gi 350404704 ref<br> XP_003487192.1 | PREDICTED: 40S ribosomal protein S17 [Bombus impatiens]                                              |
| gene7<br>079 | 223.7018<br>804 | 149.0716<br>845 | 1.5006<br>32941 | 0.5855711<br>33  | 0.017<br>671 | gi 328790583 ref<br> XP_624669.3    | PREDICTED: serine/threonine-protein phosphatase 4 catalytic subunit B-like, partial [Apis mellifera] |
| gene8<br>922 | 1257.721<br>632 | 1889.859<br>54  | 0.6655<br>1064  | -0.5874663<br>63 | 0.001<br>647 | gi 328787292 ref<br> XP_003250919.1 | PREDICTED: LOW QUALITY PROTEIN: ral guanine nucleotide dissociation stimulator [Apis mellifera]      |
| gene2<br>241 | 1260.805<br>484 | 1897.689<br>482 | 0.6643<br>89773 | -0.5898982<br>3  | 0.007<br>999 | gi 572313600 ref<br> XP_006622495.1 | PREDICTED: retinal-specific ATP-binding cassette transporter-like [Apis dorsata]                     |
| gene6<br>631 | 696.7102<br>089 | 1048.727<br>575 | 0.6643<br>386   | -0.5900093<br>53 | 0.017<br>337 | gi 571544325 ref<br> XP_006563880.1 | PREDICTED: plasma membrane calcium-transporting ATPase 3 isoform X3 [Apis mellifera]                 |
| gene9        | 385.8362        | 581.4370        | 0.6635          | -0.5916341       | 0.027        | gi 571563105 ref                    | PREDICTED: dynein heavy chain 7, axonemal-like [Apis mellifera]                                      |

|               |                 |                 |                 |                  |              |                                     |                                                                                                       |
|---------------|-----------------|-----------------|-----------------|------------------|--------------|-------------------------------------|-------------------------------------------------------------------------------------------------------|
| 337           | 693             | 111             | 90831           | 43               | 38           | XP_006570553.1                      |                                                                                                       |
| gene5<br>589  | 208.6096<br>514 | 314.3808<br>929 | 0.6635<br>57029 | -0.5917076<br>32 | 0.019<br>658 | gi 571536790 ref<br> XP_006571000.1 | PREDICTED: LON peptidase N-terminal domain and RING finger protein 3-like isoform X1 [Apis mellifera] |
| gene7<br>736  | 605.8484<br>711 | 913.8552<br>149 | 0.6629<br>58925 | -0.5930086<br>06 | 0.006<br>1   | gi 571551614 ref<br> XP_006559285.1 | PREDICTED: SNF-related serine/threonine-protein kinase-like [Apis mellifera]                          |
| gene2<br>453  | 2119.286<br>37  | 3200.208<br>476 | 0.6622<br>33847 | -0.5945873<br>45 | 0.013<br>316 | gi 571514351 ref<br> XP_006568803.1 | PREDICTED: uncharacterized protein LOC410793 [Apis mellifera]                                         |
| gene1<br>0937 | 744.5965<br>592 | 1124.502<br>932 | 0.6621<br>56174 | -0.5947565<br>68 | 0.017<br>533 | gi 571573081 ref<br> XP_006565834.1 | PREDICTED: transcription factor Sp1-like [Apis mellifera]                                             |
| gene5<br>720  | 508.9623<br>143 | 769.4301<br>774 | 0.6614<br>79533 | -0.5962315<br>77 | 0.008<br>766 | gi 328777755 ref<br> XP_396693.2    | PREDICTED: carboxylesterase 5A [Apis mellifera]                                                       |
| gene1<br>1518 | 973.7595<br>348 | 1472.114<br>539 | 0.6614<br>69953 | -0.5962524<br>71 | 0.006<br>147 | gi 571574799 ref<br> XP_006563582.1 | PREDICTED: STE20-like serine/threonine-protein kinase-like isoform X1 [Apis mellifera]                |
| gene1<br>601  | 533.5376<br>994 | 806.8457<br>359 | 0.6612<br>6358  | -0.5967026<br>51 | 0.015<br>182 | gi 571510304 ref<br> XP_006571710.1 | PREDICTED: short spindle protein 4 isoform X1 [Apis mellifera]                                        |
| gene1<br>228  | 36762.01<br>204 | 55614.13<br>429 | 0.6610<br>19227 | -0.5972358<br>6  | 0.002<br>89  | gi 571507693 ref<br> XP_006571189.1 | PREDICTED: titin-like isoform X1 [Apis mellifera]                                                     |
| gene7         | 2027.470        | 3069.567        | 0.6605          | -0.5983547       | 0.012        | gi 328781112 ref                    | PREDICTED: leukocyte receptor cluster member 8 homolog isoform X1 [Apis                               |

|               |                 |                 |                 |                  |              |                                     |                                                                                               |
|---------------|-----------------|-----------------|-----------------|------------------|--------------|-------------------------------------|-----------------------------------------------------------------------------------------------|
| 387           | 269             | 713             | 06774           | 37               | 592          | XP_001121422.2                      | mellifera]                                                                                    |
| gene6<br>17   | 3034.557<br>521 | 4596.369<br>716 | 0.6602<br>07448 | -0.5990086<br>8  | 0.003<br>329 | gi 380027719 ref<br> XP_003697566.1 | PREDICTED: 3-phosphoinositide-dependent protein kinase 1 isoform X1 [Apis florea]             |
| gene9<br>638  | 1123.906<br>313 | 1702.936<br>543 | 0.6599<br>81323 | -0.5995028<br>97 | 0.002<br>223 | gi 571564323 ref<br> XP_006562313.1 | PREDICTED: metalloproteinase inhibitor 3-like isoform X2 [Apis mellifera]                     |
| gene4<br>103  | 743.3420<br>354 | 1127.512<br>202 | 0.6592<br>76267 | -0.6010449<br>48 | 0.005<br>713 | gi 571527866 ref<br> XP_006562261.1 | PREDICTED: putative leucine-rich repeat-containing protein DDB_G0290503-like [Apis mellifera] |
| gene3<br>287  | 236.8097<br>03  | 359.7960<br>822 | 0.6581<br>77548 | -0.6034512<br>82 | 0.015<br>084 | gi 571521962 ref<br> XP_006558737.1 | PREDICTED: POU domain, class 2, transcription factor 1-like isoform X2 [Apis mellifera]       |
| gene3<br>055  | 145.2674<br>98  | 220.9723<br>452 | 0.6574<br>01259 | -0.6051538<br>74 | 0.037<br>812 | gi 861649330 gb<br> KMQ96764.1      | hypothetical protein RF55_2936, partial [Lasius niger]                                        |
| gene1<br>317  | 1113.354<br>915 | 1694.109<br>271 | 0.6571<br>91914 | -0.6056133<br>65 | 0.002<br>624 | gi 571508489 ref<br> XP_006571351.1 | PREDICTED: actin-binding LIM protein 2-like isoform X2 [Apis mellifera]                       |
| gene4<br>669  | 303.3761<br>928 | 461.6768<br>516 | 0.6571<br>18051 | -0.6057755<br>22 | 0.005<br>701 | gi 301601654 ref<br> NP_001013377.2 | venom acid phosphatase AcpH-1 precursor [Apis mellifera]                                      |
| gene1<br>1283 | 279.7410<br>828 | 425.8461<br>851 | 0.6569<br>06396 | -0.6062402<br>82 | 0.022<br>387 | gi 328780356 ref<br> XP_624636.3    | PREDICTED: serine/arginine repetitive matrix protein 2-like isoformX2 [Apis mellifera]        |
| gene1<br>139  | 2125.234<br>073 | 3236.130<br>269 | 0.6567<br>20804 | -0.6066479<br>36 | 0.005<br>314 | gi 571506210 ref<br> XP_006570777.  | PREDICTED: apoptosis 2 inhibitor-like [Apis mellifera]                                        |

|               |                 |                 |                 |                  |              |                                          |                                                                                          |
|---------------|-----------------|-----------------|-----------------|------------------|--------------|------------------------------------------|------------------------------------------------------------------------------------------|
|               |                 |                 |                 |                  |              | 1                                        |                                                                                          |
| gene9<br>274  | 1495.522<br>346 | 2278.895<br>388 | 0.6562<br>48792 | -0.6076852<br>32 | 0.002<br>727 | gi 66519258 ref <br>XP_625210.1          | PREDICTED: glycine N-methyltransferase-like [Apis mellifera]                             |
| gene5<br>244  | 329.0128<br>635 | 502.0608<br>797 | 0.6553<br>24637 | -0.6097183<br>25 | 0.022<br>638 | gi 571534392 ref <br> XP_006565398.<br>1 | PREDICTED: uncharacterized protein LOC100577669 isoform X2 [Apis mellifera]              |
| gene1<br>51   | 738.4531<br>787 | 1128.155<br>878 | 0.6545<br>66619 | -0.6113880<br>65 | 0.009<br>483 | gi 571500407 ref <br> XP_006559949.<br>1 | PREDICTED: protein muscleblind-like [Apis mellifera]                                     |
| gene1<br>0984 | 1126.669<br>035 | 1722.070<br>033 | 0.6542<br>52739 | -0.6120800<br>37 | 0.009<br>733 | gi 571573297 ref <br> XP_006558002.<br>1 | PREDICTED: histone-lysine N-methyltransferase 2C [Apis mellifera]                        |
| gene4<br>169  | 89.01634<br>454 | 136.1354<br>228 | 0.6538<br>8084  | -0.6129003<br>46 | 0.036<br>949 | gi 571527928 ref <br> XP_006564221.<br>1 | PREDICTED: estradiol 17-beta-dehydrogenase 2 [Apis mellifera]                            |
| gene9<br>757  | 247.2242<br>566 | 378.1922<br>026 | 0.6537<br>00036 | -0.6132993<br>18 | 0.026<br>58  | gi 571564875 ref <br> XP_006565275.<br>1 | PREDICTED: myelin regulatory factor-like isoform X1 [Apis mellifera]                     |
| gene2<br>671  | 104.0874<br>874 | 159.4890<br>74  | 0.6526<br>30834 | -0.6156609<br>44 | 0.037<br>144 | gi 48095402 ref <br>XP_392288.1          | PREDICTED: TNF receptor-associated factor 4-like isoform X4 [Apis mellifera]             |
| gene8<br>689  | 549.5118<br>987 | 842.7640<br>115 | 0.6520<br>35316 | -0.6169779<br>88 | 0.030<br>695 | gi 571557908 ref <br> XP_006559090.<br>1 | PREDICTED: anion exchange protein 2-like [Apis mellifera]                                |
| gene6<br>347  | 190.3543<br>911 | 292.0276<br>264 | 0.6518<br>36929 | -0.6174170<br>07 | 0.033<br>644 | gi 328777846 ref <br> XP_395849.4        | PREDICTED: transient receptor potential cation channel trpm isoform X10 [Apis mellifera] |
| gene8         | 643.9774        | 988.2161        | 0.6516          | -0.6178165       | 0.007        | gi 571557888 ref                         | PREDICTED: serine/threonine-protein kinase N [Apis mellifera]                            |

|               |                 |                 |                 |                  |              |                                     |                                                                              |
|---------------|-----------------|-----------------|-----------------|------------------|--------------|-------------------------------------|------------------------------------------------------------------------------|
| 590           | 264             | 718             | 56434           | 47               | 631          | XP_006559086.1                      |                                                                              |
| gene2<br>113  | 1180.002<br>995 | 1811.574<br>578 | 0.6513<br>68709 | -0.6184536<br>78 | 0.002<br>875 | gi 328786226 ref<br> XP_392617.4    | PREDICTED: neurotrimin [Apis mellifera]                                      |
| gene1<br>1918 | 930.8721<br>797 | 1433.029<br>81  | 0.6495<br>83263 | -0.6224136<br>35 | 0.006<br>096 | gi 571576060 ref<br> XP_006559482.1 | PREDICTED: protein sprouty, partial [Apis mellifera]                         |
| gene8<br>760  | 1301.985<br>088 | 2004.762<br>925 | 0.6494<br>45913 | -0.6227187<br>15 | 0.001<br>89  | gi 571558282 ref<br> XP_006563373.1 | PREDICTED: uncharacterized protein LOC412215 isoform X1 [Apis mellifera]     |
| gene9<br>813  | 319.1079<br>968 | 491.3766<br>104 | 0.6494<br>16334 | -0.6227844<br>24 | 0.008<br>513 | gi 328785548 ref<br> XP_003250614.1 | PREDICTED: uncharacterized protein LOC100576266 isoform X1 [Apis mellifera]  |
| gene1<br>342  | 991.8351<br>702 | 1527.884<br>322 | 0.6491<br>55931 | -0.6233630<br>31 | 0.007<br>096 | gi 571508634 ref<br> XP_006571379.1 | PREDICTED: LOW QUALITY PROTEIN: endoribonuclease Dicer-like [Apis mellifera] |
| gene1<br>135  | 206.7467<br>424 | 318.7626<br>945 | 0.6485<br>914   | -0.6246182       | 0.008<br>32  | gi 571506988 ref<br> XP_006570927.1 | PREDICTED: uncharacterized protein LOC411996 [Apis mellifera]                |
| gene8<br>482  | 120.4238<br>029 | 185.8702<br>875 | 0.6478<br>91627 | -0.6261755<br>83 | 0.029<br>855 | gi 571556504 ref<br> XP_003249116.2 | PREDICTED: dentin sialophosphoprotein-like isoform X1 [Apis mellifera]       |
| gene3<br>884  | 419.9787<br>278 | 648.8468<br>691 | 0.6472<br>69406 | -0.6275617<br>79 | 0.008<br>279 | gi 571526129 ref<br> XP_006569380.1 | PREDICTED: focal adhesion kinase 1 isoform X1 [Apis mellifera]               |
| gene1         | 139.2713        | 215.4316        | 0.6464          | -0.6293312       | 0.018        | gi 328782396 ref                    | PREDICTED: uncharacterized protein LOC412825 isoform X2 [Apis mellifera]     |

|               |                 |                 |                 |                  |              |                                         |                                                                                               |
|---------------|-----------------|-----------------|-----------------|------------------|--------------|-----------------------------------------|-----------------------------------------------------------------------------------------------|
| 1331          | 628             | 036             | 76007           | 68               | 388          | XP_396277.4                             |                                                                                               |
| gene2<br>978  | 709.9991<br>47  | 1098.639<br>27  | 0.6462<br>53203 | -0.6298285<br>69 | 0.027<br>198 | gi 328787394 ref<br> XP_001120785.<br>2 | PREDICTED: zinc finger protein 704-like isoform X1 [Apis mellifera]                           |
| gene1<br>1974 | 99.80772<br>077 | 154.9822<br>329 | 0.6439<br>94598 | -0.6348795<br>09 | 0.044<br>001 | gi 328780859 ref<br> XP_623612.3        | PREDICTED: uncharacterized protein LOC551214 [Apis mellifera]                                 |
| gene1<br>451  | 992.1353<br>899 | 1543.807<br>685 | 0.6426<br>54781 | -0.6378841<br>31 | 0.004<br>004 | gi 820854688 ref<br> XP_012344633.<br>1 | PREDICTED: sarcoplasmic reticulum histidine-rich calcium-binding protein-like [Apis florea]   |
| gene9<br>992  | 370.4742<br>15  | 576.9541<br>378 | 0.6421<br>20735 | -0.6390835<br>09 | 0.011<br>378 | gi 571566328 ref<br> XP_006557910.<br>1 | PREDICTED: probable serine/threonine-protein kinase CG32666-like isoform X1 [Apis mellifera]  |
| gene4<br>099  | 421.2642<br>988 | 656.1754<br>337 | 0.6419<br>99498 | -0.6393559<br>26 | 0.003<br>739 | gi 571527860 ref<br> XP_006562260.<br>1 | PREDICTED: putative leucine-rich repeat-containing protein DDB_G0290503-like [Apis mellifera] |
| gene2<br>765  | 400.1117<br>635 | 623.6461<br>057 | 0.6415<br>68607 | -0.6403245<br>44 | 0.003<br>744 | gi 572300533 ref<br> XP_006616356.<br>1 | PREDICTED: guanylate cyclase 32E-like [Apis dorsata]                                          |
| gene3<br>605  | 373.3388<br>511 | 582.4810<br>282 | 0.6409<br>45942 | -0.6417254<br>12 | 0.034<br>388 | gi 571523965 ref<br> XP_006562759.<br>1 | PREDICTED: rap guanine nucleotide exchange factor 6-like isoform X5 [Apis mellifera]          |
| gene3<br>639  | 888.7253<br>551 | 1386.782<br>416 | 0.6408<br>54214 | -0.6419318<br>95 | 0.025<br>267 | gi 328785371 ref<br> XP_001121634.<br>2 | PREDICTED: beta-1,3-glucan-binding protein [Apis mellifera]                                   |
| gene1<br>0139 | 163.6633<br>409 | 255.4125<br>379 | 0.6407<br>80372 | -0.6420981<br>39 | 0.041<br>345 | gi 571567534 ref<br> XP_006560383.      | PREDICTED: uncharacterized protein LOC410462 [Apis mellifera]                                 |

|              |                 |                 |                 |                  |              |                                         |                                                                                                                   |
|--------------|-----------------|-----------------|-----------------|------------------|--------------|-----------------------------------------|-------------------------------------------------------------------------------------------------------------------|
|              |                 |                 |                 |                  |              | 1                                       |                                                                                                                   |
| gene1<br>017 | 230.9547<br>054 | 361.3424<br>517 | 0.6391<br>5741  | -0.6457568<br>18 | 0.030<br>7   | gi 571506073 ref<br> XP_006570707.<br>1 | PREDICTED: myogenic-determination protein [Apis mellifera]                                                        |
| gene6<br>481 | 231.4456<br>644 | 362.3720<br>395 | 0.6386<br>96255 | -0.6467981<br>05 | 0.020<br>154 | gi 571543074 ref<br> XP_392487.4        | PREDICTED: uncharacterized protein C20orf1 12 homolog isoform X3 [Apis mellifera]                                 |
| gene2<br>167 | 1609.150<br>936 | 2521.328<br>659 | 0.6382<br>15462 | -0.6478845<br>33 | 0.002<br>763 | gi 328788856 ref<br> XP_003251195.<br>1 | PREDICTED: uncharacterized protein LOC410867 [Apis mellifera]                                                     |
| gene8<br>102 | 14585.81<br>003 | 22867.27<br>822 | 0.6378<br>46353 | -0.6487191<br>5  | 0.023<br>674 | gi 571555466 ref<br> XP_006566278.<br>1 | PREDICTED: lorocrin-like isoform X1 [Apis mellifera]                                                              |
| gene7<br>68  | 1630.065<br>966 | 2562.125<br>116 | 0.6362<br>1638  | -0.6524105<br>79 | 0.003<br>778 | gi 571503986 ref<br> XP_006568691.<br>1 | PREDICTED: triple functional domain protein isoform X1 [Apis mellifera]                                           |
| gene9<br>842 | 3410.973<br>436 | 5365.197<br>228 | 0.6357<br>59188 | -0.6534476<br>87 | 0.000<br>341 | gi 328787572 ref<br> XP_393878.3        | PREDICTED: IGF-II mRNA-binding protein isoform X4 [Apis mellifera]                                                |
| gene6<br>686 | 147.8046<br>081 | 232.6498<br>4   | 0.6353<br>09305 | -0.6544689<br>46 | 0.012<br>271 | gi 66514147 ref <br>XP_396290.2         | PREDICTED: alpha-mannosidase 2 isoform X5 [Apis mellifera]                                                        |
| gene1<br>472 | 2314.129<br>305 | 3645.182<br>416 | 0.6348<br>45953 | -0.6555215<br>34 | 0.003<br>05  | gi 48094759 ref <br>XP_392183.1         | PREDICTED: quinone oxidoreductase-like isoformX1 [Apis mellifera]                                                 |
| gene3<br>047 | 243.4078<br>469 | 383.5271<br>4   | 0.6346<br>56121 | -0.6559529<br>95 | 0.003<br>119 | gi 48095262 ref <br>XP_394396.1         | PREDICTED: putative inorganic phosphate cotransporter-like isoform X2 [Apis mellifera]                            |
| gene6<br>910 | 580.1977<br>958 | 914.2378<br>647 | 0.6346<br>24552 | -0.6560247<br>57 | 0.003<br>506 | gi 66555130 ref <br>XP_394934.2         | PREDICTED: sterol regulatory element-binding protein cleavage-activating protein-like isoform X5 [Apis mellifera] |
| gene1        | 196.5258        | 309.6814        | 0.6346          | -0.6560658       | 0.022        | gi 571568747 ref                        | PREDICTED: putative polypeptide N-acetylgalactosaminyltransferase 9-like isoform                                  |



|               |                 |                 |                 |                  |              |                                     |                                                                                                      |
|---------------|-----------------|-----------------|-----------------|------------------|--------------|-------------------------------------|------------------------------------------------------------------------------------------------------|
| 0269          | 321             | 049             | 06499           |                  | 169          | XP_006565129.1                      | X1 [Apis mellifera]                                                                                  |
| gene3<br>702  | 238.6390<br>384 | 376.5313<br>923 | 0.6337<br>82583 | -0.6579400<br>82 | 0.008<br>501 | gi 571524982 ref<br> XP_392312.3    | PREDICTED: signal-induced proliferation-associated 1-like protein 2-like isoform X3 [Apis mellifera] |
| gene1<br>166  | 1611.667<br>51  | 2543.790<br>164 | 0.6335<br>69361 | -0.6584255<br>25 | 0.004<br>672 | gi 571507165 ref<br> XP_006571083.1 | PREDICTED: calponin homology domain-containing protein DDB_G0272472-like isoform X1 [Apis mellifera] |
| gene9<br>071  | 2739.972<br>881 | 4326.543<br>743 | 0.6332<br>93697 | -0.6590533<br>75 | 0.023<br>743 | gi 571560383 ref<br> XP_006566549.1 | PREDICTED: ataxin-2 homolog isoform X2 [Apis mellifera]                                              |
| gene1<br>1309 | 222.1247<br>696 | 350.7890<br>256 | 0.6332<br>14706 | -0.6592333<br>34 | 0.009<br>07  | gi 66547762 ref<br> XP_395162.2     | PREDICTED: E3 ubiquitin-protein ligase KCMF1-like isoform X2 [Apis mellifera]                        |
| gene1<br>1476 | 152.5791<br>903 | 241.4160<br>78  | 0.6320<br>17518 | -0.6619635<br>49 | 0.027<br>074 | .                                   | .                                                                                                    |
| gene4<br>884  | 165.9914<br>729 | 263.6013<br>762 | 0.6297<br>06397 | -0.6672487<br>72 | 0.012<br>946 | gi 571532845 ref<br> XP_006560108.1 | PREDICTED: dynein heavy chain 5, axonemal [Apis mellifera]                                           |
| gene6<br>337  | 319.9521<br>158 | 508.1625<br>498 | 0.6296<br>25532 | -0.6674340<br>5  | 0.019<br>576 | gi 328777836 ref<br> XP_397383.3    | PREDICTED: myocyte-specific enhancer factor 2 isoform X6 [Apis mellifera]                            |
| gene6<br>461  | 125.4262<br>07  | 199.3830<br>756 | 0.6290<br>71483 | -0.6687041<br>32 | 0.047<br>356 | gi 571542912 ref<br> XP_006559626.1 | PREDICTED: protein SMG9-like [Apis mellifera]                                                        |
| gene2<br>362  | 285.9674<br>696 | 456.1506<br>057 | 0.6269<br>14589 | -0.6736591<br>91 | 0.009<br>382 | gi 66557637 ref<br> XP_395638.2     | PREDICTED: SH3 domain-containing RING finger protein 3 isoformX2 [Apis mellifera]                    |
| gene4<br>360  | 1484.316<br>847 | 2371.109<br>793 | 0.6260<br>00893 | -0.6757633<br>81 | 0.000<br>762 | gi 328788553 ref<br> XP_392382.4    | PREDICTED: protein similar-like [Apis mellifera]                                                     |

|               |                 |                 |                 |                  |              |                                         |                                                                                                        |
|---------------|-----------------|-----------------|-----------------|------------------|--------------|-----------------------------------------|--------------------------------------------------------------------------------------------------------|
| gene1<br>779  | 597.7658<br>412 | 955.5302<br>369 | 0.6255<br>85479 | -0.6767210<br>69 | 0.003<br>902 | gi 571511127 ref<br> XP_006559148.<br>1 | PREDICTED: ALK tyrosine kinase receptor-like isoform X1 [Apis mellifera]                               |
| gene8<br>110  | 879.6185<br>029 | 1406.161<br>808 | 0.6255<br>45722 | -0.6768127<br>58 | 0.001<br>491 | gi 571555411 ref<br> XP_006566271.<br>1 | PREDICTED: RNA-binding protein 24-like isoform X3 [Apis mellifera]                                     |
| gene7<br>438  | 993.4827<br>362 | 1589.249<br>13  | 0.6251<br>27123 | -0.6777784<br>96 | 0.001<br>275 | gi 571549403 ref<br> XP_006561854.<br>1 | PREDICTED: solute carrier organic anion transporter family member 5A1-like isoform X1 [Apis mellifera] |
| gene4<br>782  | 227.0690<br>198 | 363.8224<br>03  | 0.6241<br>20499 | -0.6801034<br>97 | 0.022<br>237 | gi 571531755 ref<br> XP_006570259.<br>1 | PREDICTED: lutropin-choriogonadotropic hormone receptor-like isoform X2 [Apis mellifera]               |
| gene2<br>015  | 182.5369<br>452 | 292.6248<br>582 | 0.6237<br>91657 | -0.6808638<br>38 | 0.010<br>76  | gi 571512920 ref<br> XP_006565932.<br>1 | PREDICTED: dihydropyrimidinase-like isoform X2 [Apis mellifera]                                        |
| gene3<br>659  | 12445.81<br>341 | 19966.66<br>673 | 0.6233<br>29551 | -0.6819329<br>84 | 0.000<br>657 | gi 571524355 ref<br> XP_006566009.<br>1 | PREDICTED: microtubule-associated protein futsch [Apis mellifera]                                      |
| gene1<br>062  | 263.0838<br>868 | 422.1214<br>878 | 0.6232<br>4211  | -0.6821353<br>81 | 0.011<br>145 | gi 571506745 ref<br> XP_006570883.<br>1 | PREDICTED: shootin-1-like isoform X1 [Apis mellifera]                                                  |
| gene1<br>0306 | 309.6483<br>173 | 496.8460<br>343 | 0.6232<br>27914 | -0.6821682<br>44 | 0.034<br>398 | gi 48105753 ref<br>XP_395996.1          | PREDICTED: long-chain-fatty-acid--CoA ligase 6-like isoform X5 [Apis mellifera]                        |
| gene1<br>492  | 472.6985<br>722 | 759.2866<br>228 | 0.6225<br>56171 | -0.6837240<br>84 | 0.011<br>794 | gi 571509864 ref<br> XP_006571637.<br>1 | PREDICTED: serine protease snake isoform X2 [Apis mellifera]                                           |

|               |                 |                 |                 |                  |              |                                         |                                                                                        |
|---------------|-----------------|-----------------|-----------------|------------------|--------------|-----------------------------------------|----------------------------------------------------------------------------------------|
| gene1<br>0793 | 412.7201<br>068 | 663.2559<br>784 | 0.6222<br>63681 | -0.6844020<br>5  | 0.012<br>998 | gi 328785091 ref<br> XP_392015.3        | PREDICTED: chloride channel protein 2-like isoform X5 [Apis mellifera]                 |
| gene2<br>647  | 748.1476<br>116 | 1204.593<br>328 | 0.6210<br>78993 | -0.6871513<br>23 | 0.028<br>392 | gi 328778864 ref<br> XP_397465.4        | PREDICTED: ATP-binding cassette sub-family A member 2-like isoform X2 [Apis mellifera] |
| gene5<br>083  | 753.2765<br>479 | 1212.884<br>917 | 0.6210<br>61848 | -0.6871911<br>49 | 0.000<br>612 | gi 820849087 ref<br> XP_012342290.<br>1 | PREDICTED: protein fem-1 homolog CG6966 isoform X1 [Apis florea]                       |
| gene6<br>694  | 321.2426<br>928 | 517.4803<br>033 | 0.6207<br>82454 | -0.6878403<br>13 | 0.008<br>905 | gi 571544009 ref<br> XP_006563828.<br>1 | PREDICTED: forkhead box protein I1-like isoform X1 [Apis mellifera]                    |
| gene8<br>608  | 93.95164<br>715 | 151.3934<br>962 | 0.6205<br>7915  | -0.6883128<br>69 | 0.013<br>545 | gi 571557367 ref<br> XP_006559002.<br>1 | PREDICTED: homeobox protein caupolican isoform X1 [Apis mellifera]                     |
| gene8<br>965  | 535.4672<br>792 | 864.5323<br>06  | 0.6193<br>72203 | -0.6911214<br>57 | 0.001<br>139 | gi 328786814 ref<br> XP_391908.4        | PREDICTED: RB1-inducible coiled-coil protein 1 isoform X3 [Apis mellifera]             |
| gene8<br>175  | 578.8175<br>925 | 935.6506<br>948 | 0.6186<br>25728 | -0.6928612<br>59 | 0.005<br>85  | gi 571555016 ref<br> XP_006566205.<br>1 | PREDICTED: serine/threonine-protein kinase mig-15 isoform X1 [Apis mellifera]          |
| gene6<br>564  | 792.0705<br>929 | 1280.728<br>85  | 0.6184<br>52995 | -0.6932641<br>47 | 0.001<br>607 | gi 571543610 ref<br> XP_006561489.<br>1 | PREDICTED: protein unc-13 homolog D isoform X1 [Apis mellifera]                        |
| gene1<br>1549 | 265.2728<br>322 | 429.0484<br>764 | 0.6182<br>81725 | -0.6936637<br>31 | 0.015<br>935 | gi 571574890 ref<br> XP_006563617.<br>1 | PREDICTED: atrial natriuretic peptide receptor 1-like isoform X1 [Apis mellifera]      |
| gene6<br>58   | 371.7259<br>21  | 601.3951<br>999 | 0.6181<br>059   | -0.6940740<br>6  | 0.002<br>041 | gi 328788793 ref<br> XP_396802.3        | PREDICTED: ubiquitin carboxyl-terminal hydrolase 31-like isoform 1 [Apis mellifera]    |

|               |                 |                 |                 |                  |              |                                         |                                                                             |
|---------------|-----------------|-----------------|-----------------|------------------|--------------|-----------------------------------------|-----------------------------------------------------------------------------|
| gene3<br>755  | 185.5576<br>605 | 300.2353<br>322 | 0.6180<br>40719 | -0.6942262<br>04 | 0.044<br>007 | gi 571524747 ref<br> XP_006567170.<br>1 | PREDICTED: NF-kappa-B inhibitor cactus 1 isoform X1 [Apis mellifera]        |
| gene1<br>637  | 101.0548<br>568 | 163.7289<br>17  | 0.6172<br>08363 | -0.6961704<br>85 | 0.035<br>418 | gi 328792845 ref<br> XP_393414.4        | PREDICTED: leishmanolysin-like peptidase [Apis mellifera]                   |
| gene5<br>650  | 551.5399<br>004 | 896.6670<br>204 | 0.6151<br>00018 | -0.7011070<br>77 | 0.020<br>003 | gi 571537270 ref<br> XP_006557373.<br>1 | PREDICTED: dentin sialophosphoprotein-like isoform X1 [Apis mellifera]      |
| gene1<br>161  | 1046.258<br>023 | 1701.806<br>552 | 0.6147<br>9257  | -0.7018283<br>66 | 0.040<br>891 | gi 328792136 ref<br> XP_397003.4        | PREDICTED: uncharacterized protein R02F2.2-like isoform X5 [Apis mellifera] |
| gene1<br>2102 | 215.5989<br>798 | 351.0136<br>041 | 0.6142<br>18302 | -0.7031765<br>94 | 0.010<br>742 | gi 571576575 ref<br> XP_006563214.<br>1 | PREDICTED: uncharacterized protein LOC724469 isoform X1 [Apis mellifera]    |
| gene3<br>261  | 51.35972<br>251 | 83.62975<br>91  | 0.6141<br>32135 | -0.703379        | 0.037<br>528 | gi 571521847 ref<br> XP_006558249.<br>1 | PREDICTED: uncharacterized protein LOC100576135 [Apis mellifera]            |
| gene9<br>471  | 320.1715<br>281 | 521.5858<br>046 | 0.6138<br>42488 | -0.7040595<br>87 | 0.023<br>819 | gi 571563474 ref<br> XP_006558394.<br>1 | PREDICTED: uncharacterized protein LOC725246 [Apis mellifera]               |
| gene9<br>913  | 405.4579<br>153 | 660.8610<br>95  | 0.6135<br>29709 | -0.7047948<br>9  | 0.016<br>983 | gi 571565878 ref<br> XP_006567026.<br>1 | PREDICTED: tolkin isoform X1 [Apis mellifera]                               |
| gene9<br>160  | 258.9864        | 422.3264<br>113 | 0.6132<br>37517 | -0.7054821<br>32 | 0.013<br>645 | .                                       | .                                                                           |
| gene9<br>918  | 50.16886<br>892 | 81.85240<br>702 | 0.6129<br>18676 | -0.7062324<br>3  | 0.038<br>787 | gi 571565909 ref<br> XP_006567030.      | PREDICTED: protein tracheless-like isoform X1 [Apis mellifera]              |

|               |                 |                 |                 |                  |              |                                         |                                                                                                |
|---------------|-----------------|-----------------|-----------------|------------------|--------------|-----------------------------------------|------------------------------------------------------------------------------------------------|
|               |                 |                 |                 |                  |              | 1                                       |                                                                                                |
| gene1<br>1752 | 447.3820<br>239 | 730.8174<br>613 | 0.6121<br>66577 | -0.7080038<br>15 | 0.004<br>821 | gi 571575649 ref<br> XP_006557820.<br>1 | PREDICTED: mitogen-activated protein kinase-binding protein 1-like isoform X1 [Apis mellifera] |
| gene1<br>177  | 173.8495<br>484 | 284.3633<br>121 | 0.6113<br>64199 | -0.7098960<br>24 | 0.034<br>172 | gi 328792187 ref<br> XP_003251692.<br>1 | PREDICTED: uncharacterized protein LOC100577522 isoform X1 [Apis mellifera]                    |
| gene8<br>414  | 220.4216<br>443 | 360.9995<br>773 | 0.6105<br>86987 | -0.7117312<br>52 | 0.018<br>656 | gi 328789808 ref<br> XP_393661.3        | PREDICTED: disks large homolog 5-like isoform X6 [Apis mellifera]                              |
| gene9<br>910  | 82.97990<br>821 | 135.9211<br>379 | 0.6105<br>00394 | -0.7119358<br>7  | 0.023<br>396 | gi 571566042 ref<br> XP_006567059.<br>1 | PREDICTED: uncharacterized protein LOC726758 [Apis mellifera]                                  |
| gene3<br>817  | 655.1878<br>775 | 1074.566<br>329 | 0.6097<br>23067 | -0.7137739<br>69 | 0.028<br>089 | gi 572307746 ref<br> XP_006619721.<br>1 | PREDICTED: CCAAT/enhancer-binding protein-like [Apis dorsata]                                  |
| gene1<br>1522 | 8045.384<br>023 | 13203.68<br>287 | 0.6093<br>28784 | -0.7147072<br>03 | 0.025<br>278 | gi 328783370 ref<br> XP_001121121.<br>2 | PREDICTED: trypsin-1-like isoform X1 [Apis mellifera]                                          |
| gene6<br>05   | 47.49572<br>922 | 77.98080<br>358 | 0.6090<br>69502 | -0.7153212<br>28 | 0.043<br>962 | gi 571502866 ref<br> XP_006565377.<br>1 | PREDICTED: golgin subfamily A member 6-like protein 2-like isoform X1 [Apis mellifera]         |
| gene7<br>184  | 74.17648<br>672 | 121.7934<br>879 | 0.6090<br>34917 | -0.7154031<br>53 | 0.033<br>584 | gi 820866416 ref<br> XP_012349637.<br>1 | PREDICTED: uncharacterized protein LOC105737031 [Apis florea]                                  |
| gene3<br>596  | 4591.144<br>077 | 7542.208<br>999 | 0.6087<br>26711 | -0.7161334<br>22 | 0.000<br>404 | gi 328782416 ref<br> XP_001120871.      | PREDICTED: uncharacterized protein LOC724971 isoform X1 [Apis mellifera]                       |

|               |                 |                 |                 |                  |              |                                         |                                                                                                       |
|---------------|-----------------|-----------------|-----------------|------------------|--------------|-----------------------------------------|-------------------------------------------------------------------------------------------------------|
|               |                 |                 |                 |                  |              | 2                                       |                                                                                                       |
| gene1<br>0161 | 252.5057<br>419 | 414.8681<br>55  | 0.6086<br>40935 | -0.7163367<br>27 | 0.005<br>515 | gi 66522653 ref<br>XP_391978.2          | PREDICTED: LIM domain-containing protein jub-like [Apis mellifera]                                    |
| gene2<br>559  | 470.3899<br>273 | 773.1466<br>82  | 0.6084<br>09682 | -0.7168849<br>82 | 0.001<br>302 | gi 328777221 ref<br> XP_397251.4        | PREDICTED: formin-binding protein 1 homolog isoform X8 [Apis mellifera]                               |
| gene5<br>499  | 1277.131<br>669 | 2100.269<br>493 | 0.6080<br>79903 | -0.7176671<br>86 | 0.016<br>907 | gi 571537009 ref<br> XP_006571028.<br>1 | PREDICTED: CD109 antigen [Apis mellifera]                                                             |
| gene1<br>1597 | 180.3892<br>695 | 296.8062<br>949 | 0.6077<br>67667 | -0.7184081<br>68 | 0.013<br>864 | gi 571575051 ref<br> XP_006563676.<br>1 | PREDICTED: disintegrin and metalloproteinase domain-containing protein 10 isoform X1 [Apis mellifera] |
| gene3<br>385  | 616.0233<br>045 | 1013.825<br>983 | 0.6076<br>22328 | -0.7187532<br>09 | 0.001<br>636 | gi 572299676 ref<br> XP_006615958.<br>1 | PREDICTED: uncharacterized protein LOC102675370 [Apis dorsata]                                        |
| gene7<br>317  | 998.5994<br>946 | 1643.693<br>259 | 0.6075<br>33972 | -0.7189630<br>11 | 0.000<br>477 | gi 571548729 ref<br> XP_006561725.<br>1 | PREDICTED: microtubule-associated protein futsch isoform X3 [Apis mellifera]                          |
| gene3<br>6    | 193.6319<br>435 | 318.9445<br>73  | 0.6071<br>02174 | -0.7199887<br>56 | 0.013<br>724 | gi 571499372 ref<br> XP_006557431.<br>1 | PREDICTED: LOW QUALITY PROTEIN: probable E3 ubiquitin-protein ligase MYCBP2-like [Apis mellifera]     |
| gene1<br>0696 | 71.06284<br>036 | 117.1301<br>334 | 0.6066<br>99901 | -0.7209450<br>19 | 0.042<br>748 | gi 571571591 ref<br> XP_006563142.<br>1 | PREDICTED: flocculation protein FLO11-like, partial [Apis mellifera]                                  |
| gene4<br>197  | 338.2446<br>956 | 558.0638<br>059 | 0.6061<br>03983 | -0.7223627<br>71 | 0.013<br>235 | gi 571528328 ref<br> XP_006564287.<br>1 | PREDICTED: ral GTPase-activating protein subunit alpha-1-like [Apis mellifera]                        |

|               |                 |                 |                 |                  |              |                                         |                                                                                                       |
|---------------|-----------------|-----------------|-----------------|------------------|--------------|-----------------------------------------|-------------------------------------------------------------------------------------------------------|
| gene9<br>303  | 1357.214<br>374 | 2240.471<br>674 | 0.6057<br>71718 | -0.7231538<br>71 | 0.002<br>075 | gi 571562868 ref<br> XP_006570507.<br>1 | PREDICTED: histone deacetylase 5 isoform X1 [Apis mellifera]                                          |
| gene4<br>612  | 132.0186<br>994 | 218.1163<br>086 | 0.6052<br>67438 | -0.7243553<br>54 | 0.012<br>24  | gi 571531460 ref<br> XP_006570008.<br>1 | PREDICTED: phosphoinositide 3-kinase adapter protein 1-like isoform X1 [Apis mellifera]               |
| gene1<br>444  | 269.1543<br>242 | 444.7627<br>554 | 0.6051<br>63811 | -0.7246023<br>78 | 0.003<br>659 | gi 571509220 ref<br> XP_006571490.<br>1 | PREDICTED: glutamate receptor ionotropic, kainate 2-like isoform X1 [Apis mellifera]                  |
| gene6<br>289  | 66.64707<br>816 | 110.3271<br>855 | 0.6040<br>85728 | -0.7271747<br>92 | 0.015<br>377 | gi 328777523 ref<br> XP_001121647.<br>2 | PREDICTED: uncharacterized protein LOC725844 [Apis mellifera]                                         |
| gene1<br>0038 | 854.6436<br>3   | 1415.040<br>13  | 0.6039<br>71302 | -0.7274480<br>93 | 0.001<br>61  | gi 571566790 ref<br> XP_006558573.<br>1 | PREDICTED: transmembrane protein 132C-like isoform X1 [Apis mellifera]                                |
| gene2<br>727  | 1938.121<br>704 | 3213.243<br>44  | 0.6031<br>66781 | -0.7293711<br>19 | 0.000<br>605 | gi 571518233 ref<br> XP_006560559.<br>1 | PREDICTED: uncharacterized protein LOC413858 isoform X1 [Apis mellifera]                              |
| gene1<br>2472 | 168.1755<br>813 | 279.0546<br>382 | 0.6026<br>61839 | -0.7305793<br>81 | 0.012<br>083 | gi 328793368 ref<br> XP_001122855.<br>2 | PREDICTED: uncharacterized protein C9orf85 homolog [Apis mellifera]                                   |
| gene6<br>707  | 1362.075<br>38  | 2264.995<br>041 | 0.6013<br>591   | -0.7337013<br>44 | 0.004<br>769 | gi 571544563 ref<br> XP_006563931.<br>1 | PREDICTED: basement membrane-specific heparan sulfate proteoglycan core protein-like [Apis mellifera] |
| gene5<br>936  | 78357.23<br>001 | 130709.5<br>025 | 0.5994<br>76155 | -0.7382257<br>25 | 0.005<br>507 | gi 571539411 ref<br> XP_006564376.      | PREDICTED: titin isoform X14 [Apis mellifera]                                                         |

|               |                 |                 |                 |                  |              |                                         |                                                                                   |
|---------------|-----------------|-----------------|-----------------|------------------|--------------|-----------------------------------------|-----------------------------------------------------------------------------------|
|               |                 |                 |                 |                  |              | 1                                       |                                                                                   |
| gene1<br>0768 | 186.7431<br>317 | 312.0300<br>478 | 0.5984<br>78041 | -0.7406297<br>82 | 0.021<br>968 | gi 328785145 ref<br> XP_003250547.<br>1 | PREDICTED: uncharacterized protein LOC100578776 isoform X1 [Apis mellifera]       |
| gene5<br>703  | 409.4730<br>53  | 685.4657<br>536 | 0.5973<br>64713 | -0.7433160<br>77 | 0.002<br>266 | gi 328776788 ref<br> XP_396348.4        | PREDICTED: octopamine receptor beta-2R isoformX5 [Apis mellifera]                 |
| gene3<br>054  | 557.4711<br>172 | 933.8435<br>121 | 0.5969<br>6417  | -0.7442837<br>52 | 0.007<br>447 | gi 571520595 ref<br> XP_006568504.<br>1 | PREDICTED: uncharacterized protein LOC725508 isoform X1 [Apis mellifera]          |
| gene1<br>528  | 658.1839<br>158 | 1104.107<br>168 | 0.5961<br>23216 | -0.7463175<br>35 | 0.007<br>504 | gi 328792704 ref<br> XP_003251765.<br>1 | PREDICTED: G-protein coupled receptor Mth2-like [Apis mellifera]                  |
| gene4<br>097  | 3975.288<br>999 | 6675.929<br>408 | 0.5954<br>66003 | -0.7479089<br>53 | 0.001<br>414 | gi 571527472 ref<br> XP_006562194.<br>1 | PREDICTED: muscle M-line assembly protein unc-89 isoform X1 [Apis mellifera]      |
| gene7<br>931  | 766.5217<br>484 | 1289.277<br>169 | 0.5945<br>36044 | -0.7501638<br>17 | 0.017<br>306 | gi 571552976 ref<br> XP_006562907.<br>1 | PREDICTED: microtubule-associated protein futsch-like isoform X1 [Apis mellifera] |
| gene7<br>351  | 48.61301<br>972 | 81.81063<br>941 | 0.5942<br>13907 | -0.7509457<br>23 | 0.033<br>365 | gi 571548873 ref<br> XP_006561744.<br>1 | PREDICTED: uncharacterized protein LOC102654791 isoform X1 [Apis mellifera]       |
| gene1<br>983  | 119.8910<br>223 | 201.7896<br>673 | 0.5941<br>3856  | -0.7511286<br>71 | 0.012<br>49  | gi 571512714 ref<br> XP_006565907.<br>1 | PREDICTED: uncharacterized protein LOC100578356 isoform X1 [Apis mellifera]       |
| gene7<br>569  | 419.9354<br>931 | 707.6226<br>704 | 0.5934<br>45505 | -0.7528125<br>38 | 0.006<br>059 | gi 328788058 ref<br> XP_003251054.      | PREDICTED: protein sprint-like [Apis mellifera]                                   |



|              |                 |                 |                 |                  |              |                                         |                                                                                               |
|--------------|-----------------|-----------------|-----------------|------------------|--------------|-----------------------------------------|-----------------------------------------------------------------------------------------------|
|              |                 |                 |                 |                  |              | 1                                       |                                                                                               |
| gene8<br>280 | 150.7346<br>158 | 254.4962<br>887 | 0.5922<br>86106 | -0.7556338<br>52 | 0.019<br>855 | gi 328786663 ref<br> XP_001121883.<br>2 | PREDICTED: trichohyalin isoform X1 [Apis mellifera]                                           |
| gene2<br>350 | 594.0028<br>259 | 1002.967<br>681 | 0.5922<br>45231 | -0.7557334<br>18 | 0.017<br>572 | gi 571514834 ref<br> XP_006568889.<br>1 | PREDICTED: bestrophin-2-like isoform X1 [Apis mellifera]                                      |
| gene9<br>824 | 574.5077<br>208 | 970.4640<br>229 | 0.5919<br>92807 | -0.7563484<br>49 | 0.009<br>484 | gi 820860434 ref<br> XP_012347067.<br>1 | PREDICTED: hairy/enhancer-of-split related with YRPW motif protein 1 isoform X1 [Apis florea] |
| gene4<br>751 | 428.2637<br>754 | 723.8136<br>737 | 0.5916<br>76824 | -0.7571187<br>1  | 0.000<br>898 | gi 571532211 ref<br> XP_006570323.<br>1 | PREDICTED: myosin-VIIa [Apis mellifera]                                                       |
| gene1<br>87  | 112.2280<br>872 | 189.8431<br>325 | 0.5911<br>62218 | -0.7583740<br>28 | 0.011<br>205 | gi 571500415 ref<br> XP_006559951.<br>1 | PREDICTED: translation initiation factor eIF-2B subunit epsilon-like [Apis mellifera]         |
| gene7<br>791 | 114.3814<br>26  | 193.6603<br>448 | 0.5906<br>29053 | -0.7596757<br>72 | 0.007<br>605 | gi 571552109 ref<br> XP_003249836.<br>2 | PREDICTED: O-glucosyltransferase rumi homolog isoform X1 [Apis mellifera]                     |
| gene7<br>087 | 242.5186<br>845 | 412.5713<br>616 | 0.5878<br>22391 | -0.7665477<br>79 | 0.006<br>393 | gi 571547082 ref<br> XP_006569898.<br>1 | PREDICTED: dentin sialophosphoprotein [Apis mellifera]                                        |
| gene2<br>789 | 211.6413<br>505 | 360.3941<br>357 | 0.5872<br>49707 | -0.7679540<br>07 | 0.002<br>026 | gi 571518556 ref<br> XP_006560971.<br>1 | PREDICTED: ATP-binding cassette sub-family C member Sur isoform X1 [Apis mellifera]           |
| gene1        | 1504.814        | 2563.186        | 0.5870          | -0.7683532       | 9.20E        | gi 571574872 ref                        | PREDICTED: DE-cadherin-like isoform X1 [Apis mellifera]                                       |

|               |                 |                 |                 |                  |              |                                     |                                                                                   |
|---------------|-----------------|-----------------|-----------------|------------------|--------------|-------------------------------------|-----------------------------------------------------------------------------------|
| 1545          | 321             | 982             | 87221           | 41               | -05          | XP_006563610.1                      |                                                                                   |
| gene1<br>772  | 602.3701<br>865 | 1026.229<br>275 | 0.5869<br>74277 | -0.7686308<br>14 | 0.007<br>414 | gi 328778092 ref<br> XP_003249448.1 | PREDICTED: putative transcription factor capicua-like isoform X1 [Apis mellifera] |
| gene5<br>535  | 50.92504<br>592 | 86.80138<br>106 | 0.5866<br>84743 | -0.7693426<br>21 | 0.025<br>136 | .                                   | .                                                                                 |
| gene6<br>228  | 55.18665<br>674 | 94.06699<br>037 | 0.5866<br>73992 | -0.7693690<br>58 | 0.034<br>56  | gi 328790219 ref<br> XP_003251395.1 | PREDICTED: uncharacterized protein LOC100578532 [Apis mellifera]                  |
| gene7<br>489  | 74.25034<br>434 | 126.7310<br>416 | 0.5858<br>89167 | -0.7713003<br>21 | 0.007<br>608 | gi 328781401 ref<br> XP_001120510.2 | PREDICTED: neprilysin-2 isoform X1 [Apis mellifera]                               |
| gene2<br>216  | 2694.368<br>596 | 4603.078<br>505 | 0.5853<br>4057  | -0.7726518<br>19 | 0.029<br>946 | gi 571515814 ref<br> XP_006569086.1 | PREDICTED: ryanodine receptor 44F isoform X1 [Apis mellifera]                     |
| gene1<br>0713 | 187.6079<br>999 | 321.8287<br>202 | 0.5829<br>43622 | -0.7785717<br>31 | 0.012<br>493 | gi 571571585 ref<br> XP_006563140.1 | PREDICTED: uncharacterized protein LOC408462 [Apis mellifera]                     |
| gene4<br>165  | 1290.149<br>797 | 2220.898<br>284 | 0.5809<br>13501 | -0.7836047<br>35 | 0.000<br>319 | gi 571527923 ref<br> XP_006564220.1 | PREDICTED: ribosome-releasing factor 2, mitochondrial-like [Apis mellifera]       |
| gene2<br>90   | 123.3381<br>322 | 212.3288<br>265 | 0.5808<br>82654 | -0.7836813<br>45 | 0.023<br>111 | gi 571500821 ref<br> XP_006561977.1 | PREDICTED: uncharacterized protein LOC102653658 [Apis mellifera]                  |
| gene5         | 67.13570        | 115.6059        | 0.5807          | -0.7840632       | 0.015        | .                                   | .                                                                                 |

|               |                 |                 |                 |                  |              |                                         |                                                                                                           |
|---------------|-----------------|-----------------|-----------------|------------------|--------------|-----------------------------------------|-----------------------------------------------------------------------------------------------------------|
| 120           | 96              | 356             | 28915           | 25               | 785          |                                         |                                                                                                           |
| gene8<br>393  | 46.84174<br>775 | 80.87903<br>085 | 0.5791<br>58124 | -0.7879708<br>03 | 0.034<br>656 |                                         |                                                                                                           |
| gene1<br>0034 | 44.24382<br>777 | 76.39871<br>617 | 0.5791<br>17425 | -0.7880721<br>89 | 0.047<br>631 |                                         |                                                                                                           |
| gene3<br>079  | 117.6367<br>821 | 203.9695<br>793 | 0.5767<br>36896 | -0.7940147<br>75 | 0.027<br>589 | gi 571520772 ref<br> XP_006568534.<br>1 | PREDICTED: succinate dehydrogenase [ubiquinone] flavoprotein subunit, mitochondrial-like [Apis mellifera] |
| gene2<br>321  | 1166.830<br>139 | 2027.456<br>931 | 0.5755<br>14143 | -0.7970767<br>12 | 0.000<br>216 | gi 571515056 ref<br> XP_006568926.<br>1 | PREDICTED: uncharacterized protein LOC725893 isoform X2 [Apis mellifera]                                  |
| gene1<br>2892 | 183.9954<br>124 | 320.0585<br>348 | 0.5748<br>80506 | -0.7986659<br>85 | 0.006<br>475 | gi 571578616 ref<br> XP_006572452.<br>1 | PREDICTED: filamin-A-like [Apis mellifera]                                                                |
| gene1<br>0195 | 110.9936<br>395 | 193.8242<br>462 | 0.5726<br>50954 | -0.8042720<br>49 | 0.007<br>103 | gi 328779553 ref<br> XP_001121446.<br>2 | PREDICTED: lachesin-like [Apis mellifera]                                                                 |
| gene2<br>328  | 2411.604<br>985 | 4214.758<br>495 | 0.5721<br>8106  | -0.8054563<br>5  | 0.000<br>144 | gi 571514985 ref<br> XP_006568907.<br>1 | PREDICTED: microtubule-associated protein futsch-like isoform X1 [Apis mellifera]                         |
| gene2<br>730  | 95.24785<br>639 | 166.6885<br>839 | 0.5714<br>11996 | -0.8073967<br>72 | 0.012<br>745 | gi 571518206 ref<br> XP_006560552.<br>1 | PREDICTED: dual oxidase isoform X1 [Apis mellifera]                                                       |
| gene3<br>256  | 138.8088<br>097 | 243.0170<br>749 | 0.5711<br>89534 | -0.8079585<br>5  | 0.002<br>468 | gi 328776907 ref<br> XP_624136.3        | PREDICTED: transcriptional activator cubitus interruptus isoform X2 [Apis mellifera]                      |
| gene9         | 1026.303        | 1797.468        | 0.5709          | -0.8085087       | 0.000        | gi 571562942 ref                        | PREDICTED: uncharacterized protein LOC408333 isoform X1 [Apis mellifera]                                  |

|               |                 |                 |                 |                  |              |                                     |                                                                                    |
|---------------|-----------------|-----------------|-----------------|------------------|--------------|-------------------------------------|------------------------------------------------------------------------------------|
| 296           | 46              | 067             | 71735           | 67               | 46           | XP_006570521.1                      |                                                                                    |
| gene7<br>413  | 53.33314<br>305 | 93.42692<br>334 | 0.5708<br>54109 | -0.8088060<br>07 | 0.019<br>58  | gi 571549265 ref<br> XP_006561821.1 | PREDICTED: uncharacterized protein LOC100578091 [Apis mellifera]                   |
| gene7<br>676  | 131.9770<br>873 | 231.3469<br>165 | 0.5704<br>72645 | -0.8097703<br>87 | 0.014<br>535 | gi 571550740 ref<br> XP_006567539.1 | PREDICTED: transcription factor Sp8-like [Apis mellifera]                          |
| gene1<br>1165 | 77.65491<br>069 | 136.3422<br>605 | 0.5695<br>58627 | -0.8120837<br>42 | 0.018<br>024 | gi 328779954 ref<br> XP_394109.3    | PREDICTED: G protein-coupled receptor kinase 2 isoform X2 [Apis mellifera]         |
| gene5<br>940  | 13158.27<br>386 | 23235.23<br>383 | 0.5663<br>06926 | -0.8203439<br>19 | 0.015<br>201 | gi 571539415 ref<br> XP_006564377.1 | PREDICTED: titin-like [Apis mellifera]                                             |
| gene1<br>1835 | 121.6574<br>978 | 215.6097<br>719 | 0.5642<br>48534 | -0.8255973<br>29 | 0.018<br>19  | gi 328778440 ref<br> XP_623903.2    | PREDICTED: homeotic protein Sex combs reduced [Apis mellifera]                     |
| gene1<br>856  | 979.8056<br>918 | 1743.035<br>347 | 0.5621<br>26117 | -0.8310342<br>49 | 0.008<br>518 | gi 328780582 ref<br> XP_393610.4    | PREDICTED: rho guanine nucleotide exchange factor 12 isoform X4 [Apis mellifera]   |
| gene1<br>1699 | 245.7112<br>455 | 437.8011<br>755 | 0.5612<br>39346 | -0.8333119<br>41 | 0.013<br>403 | gi 66554761 ref<br>XP_397331.2      | PREDICTED: ankyrin repeat and SOCS box protein 16-like isoform X2 [Apis mellifera] |
| gene3<br>967  | 1112.705<br>355 | 1983.131<br>479 | 0.5610<br>85014 | -0.8337087<br>13 | 0.026<br>652 | gi 571526651 ref<br> XP_006557955.1 | PREDICTED: uncharacterized protein LOC102655788 [Apis mellifera]                   |
| gene3<br>829  | 647.9128<br>849 | 1156.454<br>344 | 0.5602<br>58075 | -0.8358365<br>56 | 0.000<br>248 | gi 334724440 ref<br> NP_001229316.1 | filamin-like [Apis mellifera]                                                      |
| gene3         | 1191.702        | 2128.499        | 0.5598          | -0.8368121       | 0.001        | gi 571521734 ref                    | PREDICTED: zinc finger protein 1-like [Apis mellifera]                             |

|               |                 |                 |                 |                  |              |                                     |                                                                                                 |
|---------------|-----------------|-----------------|-----------------|------------------|--------------|-------------------------------------|-------------------------------------------------------------------------------------------------|
| 235           | 967             | 676             | 79327           | 83               | 162          | XP_006557404.1                      |                                                                                                 |
| gene4<br>934  | 308.6458<br>936 | 551.9530<br>034 | 0.5591<br>8872  | -0.8385928<br>35 | 0.000<br>5   | gi 571533018 ref<br> XP_006561305.1 | PREDICTED: probable phospholipid-transporting ATPase ID-like isoform X1 [Apis mellifera]        |
| gene8<br>463  | 2340.853<br>831 | 4195.204<br>192 | 0.5579<br>83289 | -0.8417061<br>81 | 0.009<br>457 | gi 571556170 ref<br> XP_006569704.1 | PREDICTED: abaecin isoform X1 [Apis mellifera]                                                  |
| gene3<br>140  | 121.2763<br>199 | 217.4227<br>238 | 0.5577<br>90454 | -0.8422048<br>5  | 0.009<br>17  | gi 328789915 ref<br> XP_001120679.2 | PREDICTED: G-protein coupled receptor Mth2-like [Apis mellifera]                                |
| gene3<br>491  | 346.3923<br>036 | 621.1596<br>051 | 0.5576<br>54266 | -0.8425571<br>37 | 0.001<br>539 | gi 110755844 ref<br> XP_396884.3    | PREDICTED: protein kibra-like isoformX2 [Apis mellifera]                                        |
| gene1<br>0281 | 451.8555<br>21  | 811.0068<br>634 | 0.5571<br>53757 | -0.8438525<br>74 | 0.000<br>865 | gi 328785317 ref<br> XP_001120437.2 | PREDICTED: integrin alpha-PS2 isoform X1 [Apis mellifera]                                       |
| gene7<br>848  | 241.6271<br>2   | 433.8862<br>796 | 0.5568<br>90437 | -0.8445345<br>75 | 0.000<br>728 | gi 571552520 ref<br> XP_006562428.1 | PREDICTED: gamma-tubulin complex component 5-like, partial [Apis mellifera]                     |
| gene8<br>361  | 1624.112<br>131 | 2916.713<br>903 | 0.5568<br>29427 | -0.8446926<br>39 | 0.000<br>147 | gi 571555508 ref<br> XP_006566284.1 | PREDICTED: LOW QUALITY PROTEIN: kinase D-interacting substrate of 220 kDa-like [Apis mellifera] |
| gene5<br>038  | 437.1798<br>776 | 786.1936<br>402 | 0.5560<br>71501 | -0.8466576<br>95 | 0.000<br>375 | gi 328782190 ref<br> XP_394861.4    | PREDICTED: nose resistant to fluoxetine protein 6-like [Apis mellifera]                         |
| gene1<br>1810 | 465.4494<br>826 | 837.9655<br>602 | 0.5554<br>51805 | -0.8482663<br>58 | 0.003<br>422 | gi 571575481 ref<br> XP_006557753.1 | PREDICTED: growth factor receptor-bound protein 14-like isoform X2 [Apis mellifera]             |

|              |                 |                 |                 |                  |              |                                         |                                                                                                                                |
|--------------|-----------------|-----------------|-----------------|------------------|--------------|-----------------------------------------|--------------------------------------------------------------------------------------------------------------------------------|
|              |                 |                 |                 |                  |              | 1                                       |                                                                                                                                |
| gene7<br>921 | 920.7560<br>859 | 1662.295<br>165 | 0.5539<br>06493 | -0.8522856<br>44 | 0.003<br>657 | gi 328782724 ref<br> XP_393711.3        | PREDICTED: protein kinase DC2 isoform X2 [Apis mellifera]                                                                      |
| gene3<br>655 | 120.1303<br>151 | 217.5027<br>851 | 0.5523<br>16215 | -0.8564336<br>11 | 0.019<br>218 | gi 571524339 ref<br> XP_006566006.<br>1 | PREDICTED: ETS-like protein pointed, isoform P1-like isoform X1 [Apis mellifera]                                               |
| gene2<br>93  | 214.7277<br>095 | 389.1927<br>684 | 0.5517<br>25846 | -0.8579765<br>28 | 0.007<br>644 | gi 571500707 ref<br> XP_006561972.<br>1 | PREDICTED: furin-like isoform X1 [Apis mellifera]                                                                              |
| gene7<br>729 | 38.81224<br>861 | 70.40892<br>821 | 0.5512<br>40441 | -0.8592463<br>62 | 0.037<br>266 | gi 66518356 ref <br>XP_395932.2         | PREDICTED: knirps-related protein isoform X3 [Apis mellifera]                                                                  |
| gene4<br>104 | 1330.572<br>987 | 2420.827<br>967 | 0.5496<br>35499 | -0.8634529<br>1  | 8.94E<br>-05 | gi 571527532 ref<br> XP_006562205.<br>1 | PREDICTED: dentin sialophosphoprotein-like [Apis mellifera]                                                                    |
| gene4<br>810 | 1774.559<br>912 | 3232.714<br>016 | 0.5489<br>38107 | -0.8652846<br>02 | 7.58E<br>-05 | gi 58585174 ref <br>NP_001011615.<br>1  | hymenoptaecin preproprotein [Apis mellifera]                                                                                   |
| gene2<br>45  | 27.81387<br>623 | 50.69561<br>74  | 0.5486<br>4459  | -0.8660562<br>15 | 0.037<br>025 | gi 571501010 ref<br> XP_006562006.<br>1 | PREDICTED: autophagy-related protein 23-like isoform X1 [Apis mellifera]                                                       |
| gene8<br>442 | 26.27644<br>332 | 48.09953<br>033 | 0.5462<br>93137 | -0.8722527<br>95 | 0.026<br>813 | gi 328790437 ref<br> XP_623893.3        | PREDICTED: Bardet-Biedl syndrome 5 protein homolog [Apis mellifera]                                                            |
| gene5<br>125 | 464.9121<br>149 | 851.6184<br>251 | 0.5459<br>15989 | -0.8732491<br>42 | 0.009<br>325 | gi 571533916 ref<br> XP_006564143.<br>1 | PREDICTED: sushi, von Willebrand factor type A, EGF and pentraxin domain-containing protein 1-like isoform X1 [Apis mellifera] |
| gene1        | 92.87560        | 170.4184        | 0.5449          | -0.8757099       | 0.011        | gi 328792499 ref                        | PREDICTED: major facilitator superfamily domain-containing protein 12-like                                                     |

|               |                 |                 |                 |                  |              |                                     |                                                                                                   |
|---------------|-----------------|-----------------|-----------------|------------------|--------------|-------------------------------------|---------------------------------------------------------------------------------------------------|
| 435           | 616             | 576             | 85605           | 72               | 766          | XP_624057.2                         | isoform X2 [Apis mellifera]                                                                       |
| gene7<br>497  | 269.5589<br>499 | 495.0417<br>992 | 0.5445<br>17554 | -0.8769495<br>35 | 0.001<br>779 | gi 571549689 ref<br> XP_006561911.1 | PREDICTED: organic solute transporter alpha-like protein-like [Apis mellifera]                    |
| gene3<br>479  | 191.0674<br>834 | 351.1611<br>622 | 0.5441<br>01979 | -0.8780510<br>19 | 0.000<br>407 | gi 571523199 ref<br> XP_006562043.1 | PREDICTED: kinetochore-associated protein 1-like [Apis mellifera]                                 |
| gene2<br>437  | 5390.454<br>677 | 9907.457<br>278 | 0.5440<br>80537 | -0.8781078<br>74 | 0.000<br>939 | gi 571514423 ref<br> XP_006568818.1 | PREDICTED: LOW QUALITY PROTEIN: twitchin [Apis mellifera]                                         |
| gene7<br>226  | 352.1656<br>826 | 649.4281<br>216 | 0.5422<br>70454 | -0.8829155<br>28 | 0.006<br>065 | gi 571548223 ref<br> XP_006561630.1 | PREDICTED: la-related protein 4-like isoform X1 [Apis mellifera]                                  |
| gene2<br>936  | 210.1127<br>632 | 388.4259<br>669 | 0.5409<br>33874 | -0.8864758<br>5  | 0.014<br>878 | gi 571519626 ref<br> XP_003250376.2 | PREDICTED: uncharacterized protein LOC100577178 isoform X1 [Apis mellifera]                       |
| gene3<br>179  | 591.5339<br>784 | 1095.332<br>288 | 0.5400<br>49796 | -0.8888356<br>56 | 0.000<br>232 | gi 572297383 ref<br> XP_006614882.1 | PREDICTED: protein crumbs-like isoform X1 [Apis dorsata]                                          |
| gene7<br>000  | 40.52292<br>013 | 75.23391<br>33  | 0.5386<br>25712 | -0.8926449<br>94 | 0.020<br>759 | gi 571546304 ref<br> XP_006568595.1 | PREDICTED: cAMP-specific 3',5'-cyclic phosphodiesterase, isoforms N/G isoform X9 [Apis mellifera] |
| gene1<br>2577 | 122.0396<br>975 | 226.8014<br>939 | 0.5380<br>9036  | -0.8940796<br>34 | 0.000<br>831 | gi 328793514 ref<br> XP_395995.3    | PREDICTED: organic cation transporter protein-like isoform 1 [Apis mellifera]                     |
| gene4<br>978  | 385.6083<br>453 | 716.7141<br>701 | 0.5380<br>22494 | -0.8942616<br>03 | 0.043<br>769 | gi 571533289 ref<br> XP_006561360.  | PREDICTED: uncharacterized protein LOC725964 isoform X1 [Apis mellifera]                          |

|               |                 |                 |                 |                  |              |                                         |                                                                                     |
|---------------|-----------------|-----------------|-----------------|------------------|--------------|-----------------------------------------|-------------------------------------------------------------------------------------|
| gene1<br>3340 | 85.37982<br>222 | 158.8080<br>02  | 0.5376<br>2922  | -0.8953165<br>44 | 0.022<br>628 | gi 328794317 ref<br> XP_001123227.<br>2 | PREDICTED: short spindle protein 4-like [Apis mellifera]                            |
| gene4<br>364  | 364.0765<br>407 | 677.6822<br>877 | 0.5372<br>37799 | -0.8963672<br>81 | 0.000<br>117 | gi 571529190 ref<br> XP_006567731.<br>1 | PREDICTED: centrosomal and chromosomal factor-like isoform X1 [Apis mellifera]      |
| gene1<br>1853 | 44.49606<br>611 | 82.98266<br>06  | 0.5362<br>09201 | -0.8991321<br>21 | 0.037<br>561 | .                                       | .                                                                                   |
| gene1<br>1391 | 68.98188<br>973 | 128.7376<br>318 | 0.5358<br>33142 | -0.9001442<br>79 | 0.024<br>847 | gi 571575347 ref<br> XP_006563782.<br>1 | PREDICTED: neurofilament medium polypeptide-like [Apis mellifera]                   |
| gene1<br>209  | 8231.385<br>857 | 15384.16<br>287 | 0.5350<br>55819 | -0.9022386<br>89 | 0.000<br>565 | gi 328792196 ref<br> XP_001121241.<br>2 | PREDICTED: probable serine/threonine-protein kinase clkA-like [Apis mellifera]      |
| gene7<br>811  | 23.10989<br>267 | 43.29933<br>462 | 0.5337<br>23968 | -0.9058342<br>96 | 0.035<br>218 | gi 572305324 ref<br> XP_006618592.<br>1 | PREDICTED: uncharacterized protein LOC102678905 [Apis dorsata]                      |
| gene3<br>021  | 377.4088<br>751 | 707.7993<br>651 | 0.5332<br>14487 | -0.9072121<br>18 | 0.010<br>986 | gi 571520122 ref<br> XP_006568040.<br>1 | PREDICTED: guanine nucleotide-releasing factor 2-like isoform X1 [Apis mellifera]   |
| gene1<br>537  | 571.5571<br>532 | 1076.599<br>089 | 0.5308<br>91359 | -0.9135114<br>36 | 0.000<br>687 | gi 66501273 ref <br>XP_392808.2         | PREDICTED: tribbles homolog 2 isoform X2 [Apis mellifera]                           |
| gene1<br>0957 | 74.49084<br>601 | 140.3371<br>073 | 0.5307<br>99355 | -0.9137614<br>78 | 0.007<br>081 | gi 571573151 ref<br> XP_006565859.<br>1 | PREDICTED: facilitated trehalose transporter Tret1-like isoform X1 [Apis mellifera] |



|               |                 |                 |                 |                  |              |                                         |                                                                                               |
|---------------|-----------------|-----------------|-----------------|------------------|--------------|-----------------------------------------|-----------------------------------------------------------------------------------------------|
| gene1<br>0825 | 255.6422<br>321 | 483.1018<br>137 | 0.5291<br>68438 | -0.9182010<br>8  | 0.000<br>672 | gi 571572421 ref<br> XP_006565003.<br>1 | PREDICTED: protein ccsmt1-like isoform X2 [Apis mellifera]                                    |
| gene7<br>264  | 35.40543<br>977 | 67.05525<br>795 | 0.5280<br>03931 | -0.9213794<br>25 | 0.045<br>847 | gi 571548069 ref<br> XP_006561588.<br>1 | PREDICTED: sodium channel protein paralytic isoform X16 [Apis mellifera]                      |
| gene1<br>592  | 437.2792<br>416 | 829.8480<br>737 | 0.5269<br>38913 | -0.9242923<br>73 | 0.031<br>172 | gi 328792769 ref<br> XP_003251772.<br>1 | PREDICTED: uncharacterized protein LOC100578606 isoform X1 [Apis mellifera]                   |
| gene6<br>984  | 88.52572<br>791 | 168.4609<br>885 | 0.5254<br>96904 | -0.9282458<br>3  | 0.028<br>175 | gi 66535525 ref<br>XP_624087.1          | PREDICTED: thioredoxin domain-containing protein 9-like [Apis mellifera]                      |
| gene4<br>765  | 20923.09<br>459 | 39855.49<br>85  | 0.5249<br>73853 | -0.9296825<br>27 | 1.97E<br>-06 | gi 572315326 ref<br> XP_006623317.<br>1 | PREDICTED: uncharacterized protein LOC102673964 [Apis dorsata]                                |
| gene1<br>829  | 664.3570<br>676 | 1265.994<br>895 | 0.5247<br>70732 | -0.9302408<br>36 | 0.000<br>111 | gi 571511699 ref<br> XP_006561153.<br>1 | PREDICTED: pleckstrin homology-like domain family B member 2-like isoform X1 [Apis mellifera] |
| gene3<br>362  | 346.0527<br>325 | 659.7843<br>173 | 0.5244<br>93722 | -0.9310025<br>9  | 0.013<br>257 | gi 571523080 ref<br> XP_006560680.<br>1 | PREDICTED: protein held out wings [Apis mellifera]                                            |
| gene4<br>164  | 1181.265<br>858 | 2259.040<br>136 | 0.5229<br>06096 | -0.9353762<br>06 | 0.011<br>032 | gi 571527908 ref<br> XP_006564216.<br>1 | PREDICTED: transcription factor kayak isoform X1 [Apis mellifera]                             |
| gene8<br>785  | 191.6641<br>266 | 367.0591<br>328 | 0.5221<br>61443 | -0.9374321<br>63 | 0.001<br>683 | gi 328784384 ref<br> XP_003250447.<br>1 | PREDICTED: transcriptional regulator Myc-B-like [Apis mellifera]                              |

|               |                 |                 |                 |                  |              |                                         |                                                                                               |
|---------------|-----------------|-----------------|-----------------|------------------|--------------|-----------------------------------------|-----------------------------------------------------------------------------------------------|
| gene1<br>1296 | 143.9526<br>46  | 275.8066<br>402 | 0.5219<br>33213 | -0.9380628<br>83 | 0.001<br>711 | gi 571574152 ref<br> XP_006561080.<br>1 | PREDICTED: protein TANC2-like isoform X1 [Apis mellifera]                                     |
| gene1<br>0294 | 74.50743<br>025 | 142.9572<br>212 | 0.5211<br>86895 | -0.9401272<br>86 | 0.003<br>518 | gi 110762343 ref<br> XP_001120949.<br>1 | PREDICTED: protein odd-skipped-like [Apis mellifera]                                          |
| gene7<br>453  | 75.87599<br>362 | 145.6163<br>151 | 0.5210<br>67942 | -0.9404565<br>98 | 0.012<br>307 | gi 571549438 ref<br> XP_006561864.<br>1 | PREDICTED: DBF4-type zinc finger-containing protein 2 homolog isoform X1 [Apis mellifera]     |
| gene8<br>492  | 2108.704<br>491 | 4047.854<br>954 | 0.5209<br>43689 | -0.9408006<br>62 | 3.87E<br>-05 | gi 571556561 ref<br> XP_006557505.<br>1 | PREDICTED: protein-methionine sulfoxide oxidase Mical isoform X1 [Apis mellifera]             |
| gene8<br>982  | 440.4994<br>557 | 847.7738<br>227 | 0.5195<br>95491 | -0.9445391<br>83 | 0.015<br>187 | .                                       | .                                                                                             |
| gene4<br>446  | 57.61611<br>763 | 110.9036<br>011 | 0.5195<br>153   | -0.9447618<br>56 | 0.035<br>495 | gi 328788288 ref<br> XP_003251097.<br>1 | PREDICTED: solute carrier family 52, riboflavin transporter, member 3-A-like [Apis mellifera] |
| gene1<br>316  | 58.47442<br>53  | 113.1183<br>084 | 0.5169<br>31575 | -0.9519547<br>68 | 0.007<br>694 | gi 328792339 ref<br> XP_396231.3        | PREDICTED: chondroitin sulfate proteoglycan 4 isoform X3 [Apis mellifera]                     |
| gene1<br>204  | 111.3118<br>639 | 216.0035<br>464 | 0.5153<br>24242 | -0.9564476<br>33 | 0.007<br>917 | gi 571507384 ref<br> XP_006571131.<br>1 | PREDICTED: tropomyosin-2-like [Apis mellifera]                                                |
| gene7<br>954  | 128.1357<br>518 | 248.7649<br>421 | 0.5150<br>8766  | -0.9571101<br>18 | 0.000<br>369 | gi 572299973 ref<br> XP_006616097.<br>1 | PREDICTED: G-protein coupled receptor moody-like isoform X1 [Apis dorsata]                    |
| gene7         | 259.1346        | 503.2459        | 0.5149          | -0.9575616       | 0.018        | gi 571552117 ref                        | PREDICTED: matrix metalloproteinase-14-like isoform X1 [Apis mellifera]                       |

|               |                 |                 |                 |                  |              |                                     |                                                                             |
|---------------|-----------------|-----------------|-----------------|------------------|--------------|-------------------------------------|-----------------------------------------------------------------------------|
| 792           | 618             | 475             | 26475           | 47               | 441          | XP_006561295.1                      |                                                                             |
| gene3<br>541  | 82.22652<br>874 | 160.1168<br>054 | 0.5135<br>40903 | -0.9614489<br>06 | 0.004<br>823 | gi 571523594 ref<br> XP_006562689.1 | PREDICTED: PHD finger protein rhinoceros-like isoform X1 [Apis mellifera]   |
| gene7<br>062  | 1599.908<br>367 | 3124.904<br>822 | 0.5119<br>86271 | -0.9658229<br>7  | 0.000<br>48  | gi 110759161 ref<br> XP_394764.3    | PREDICTED: uncharacterized protein LOC411290 isoform X4 [Apis mellifera]    |
| gene1<br>219  | 54.71316<br>557 | 106.9464<br>721 | 0.5115<br>93926 | -0.9669289<br>59 | 0.039<br>829 | gi 328792207 ref<br> XP_623471.3    | PREDICTED: diacylglycerol kinase 1 isoform X4 [Apis mellifera]              |
| gene9<br>639  | 33.25978<br>011 | 65.06106<br>237 | 0.5112<br>08685 | -0.9680157<br>49 | 0.020<br>281 | .                                   | .                                                                           |
| gene1<br>2547 | 191.7600<br>221 | 376.9126<br>195 | 0.5087<br>65194 | -0.9749281<br>19 | 0.006<br>026 | gi 571577791 ref<br> XP_006572178.1 | PREDICTED: uncharacterized protein LOC552030 isoform X1 [Apis mellifera]    |
| gene7<br>816  | 418.2899<br>358 | 822.8447<br>861 | 0.5083<br>46097 | -0.9761170<br>33 | 5.75E<br>-05 | gi 571552186 ref<br> XP_006562089.1 | PREDICTED: uncharacterized protein LOC412101 isoform X1 [Apis mellifera]    |
| gene2<br>242  | 202.8623<br>71  | 399.4236<br>025 | 0.5078<br>87791 | -0.9774183<br>02 | 0.000<br>773 | .                                   | .                                                                           |
| gene6<br>240  | 24.09454<br>014 | 47.47878<br>843 | 0.5074<br>80097 | -0.9785768<br>54 | 0.025<br>873 | gi 571540842 ref<br> XP_006569464.1 | PREDICTED: uncharacterized protein LOC102656235 [Apis mellifera]            |
| gene7<br>256  | 633.1860<br>671 | 1253.845<br>826 | 0.5049<br>95155 | -0.9856585<br>48 | 2.40E<br>-05 | gi 571548368 ref<br> XP_006561662.1 | PREDICTED: uncharacterized protein LOC100576640 isoform X3 [Apis mellifera] |
| gene7         | 27.14715        | 53.77944        | 0.5047          | -0.9862536       | 0.024        | gi 571550528 ref                    | PREDICTED: dynein heavy chain 10, axonemal-like [Apis mellifera]            |

|               |                 |                 |                 |                  |              |                                     |                                                                                            |
|---------------|-----------------|-----------------|-----------------|------------------|--------------|-------------------------------------|--------------------------------------------------------------------------------------------|
| 635           | 86              | 306             | 86905           | 11               | 726          | XP_006567505.1                      |                                                                                            |
| gene1<br>1798 | 296.5403<br>31  | 588.8148<br>421 | 0.5036<br>22378 | -0.9895857<br>05 | 0.000<br>267 | gi 571575747 ref<br> XP_006557850.1 | PREDICTED: microtubule-associated protein futsch-like [Apis mellifera]                     |
| gene4<br>200  | 93.82113<br>071 | 186.3316<br>695 | 0.5035<br>16825 | -0.9898881<br>07 | 0.006<br>872 | gi 571528133 ref<br> XP_006564252.1 | PREDICTED: homeobox protein SIX2-like isoform X1 [Apis mellifera]                          |
| gene7<br>405  | 53.39629<br>754 | 106.2002<br>16  | 0.5027<br>88973 | -0.9919750<br>86 | 0.007<br>054 | gi 571549180 ref<br> XP_006561803.1 | PREDICTED: uncharacterized protein LOC411336 isoform X1 [Apis mellifera]                   |
| gene5<br>111  | 178.9338<br>348 | 356.2924<br>304 | 0.5022<br>10599 | -0.9936356<br>19 | 0.001<br>876 | gi 571533996 ref<br> XP_006564155.1 | PREDICTED: probable serine/threonine-protein kinase dyrk2-like isoform X2 [Apis mellifera] |
| gene1<br>0175 | 1919.455<br>095 | 3834.484<br>238 | 0.5005<br>77125 | -0.9983357<br>3  | 0.002<br>087 | gi 571567823 ref<br> XP_006560440.1 | PREDICTED: piezo-type mechanosensitive ion channel component 2 isoform X1 [Apis mellifera] |
| gene1<br>2075 | 1812.873<br>106 | 3623.007<br>821 | 0.5003<br>77917 | -0.9989099<br>74 | 0.000<br>286 | gi 328782977 ref<br> XP_392097.4    | PREDICTED: collagen alpha-1(IV) chain-like isoform 1 [Apis mellifera]                      |
| gene4<br>431  | 2687.497<br>961 | 5413.604<br>42  | 0.4964<br>34123 | -1.0103258<br>12 | 0.000<br>344 | gi 571529759 ref<br> XP_006567837.1 | PREDICTED: dual specificity protein phosphatase 10 [Apis mellifera]                        |
| gene1<br>1110 | 222.8969<br>045 | 449.6028<br>539 | 0.4957<br>63989 | -1.0122746<br>12 | 0.000<br>393 | gi 328779092 ref<br> XP_624412.2    | PREDICTED: putative amino acid permease F13H10.3-like [Apis mellifera]                     |
| gene3<br>277  | 667.4635<br>441 | 1347.672<br>757 | 0.4952<br>7123  | -1.0137092<br>77 | 0.001<br>33  | gi 572268404 ref<br> XP_006612252.1 | PREDICTED: vesicular glutamate transporter 2-like isoform X1 [Apis dorsata]                |

|               |                 |                 |                 |                  |              |                                         |                                                                                    |
|---------------|-----------------|-----------------|-----------------|------------------|--------------|-----------------------------------------|------------------------------------------------------------------------------------|
|               |                 |                 |                 |                  |              | 1                                       |                                                                                    |
| gene1<br>0310 | 270.4031<br>593 | 550.8279<br>852 | 0.4909<br>03089 | -1.0264898<br>51 | 0.000<br>182 | gi 571568775 ref<br> XP_006565137.<br>1 | PREDICTED: talin-1-like [Apis mellifera]                                           |
| gene1<br>1284 | 25.13949<br>354 | 51.23555<br>25  | 0.4906<br>65023 | -1.0271896<br>63 | 0.032<br>538 | .                                       | .                                                                                  |
| gene9<br>887  | 116.8886<br>776 | 238.4525<br>218 | 0.4901<br>96861 | -1.0285668<br>5  | 0.012<br>51  | gi 571565676 ref<br> XP_006566994.<br>1 | PREDICTED: putative fatty acyl-CoA reductase CG5065-like [Apis mellifera]          |
| gene4<br>038  | 144.5028<br>094 | 295.1621<br>575 | 0.4895<br>70921 | -1.0304102<br>25 | 0.005<br>257 | gi 328780431 ref<br> XP_396579.2        | PREDICTED: putative ferric-chelate reductase 1 homolog isoformX1 [Apis mellifera]  |
| gene2<br>768  | 566.8317<br>017 | 1161.851<br>99  | 0.4878<br>69114 | -1.0354339<br>41 | 0.001<br>104 | gi 571518921 ref<br> XP_006561030.<br>1 | PREDICTED: LOW QUALITY PROTEIN: uncharacterized protein LOC551170 [Apis mellifera] |
| gene6<br>632  | 30.42797<br>002 | 62.43042<br>601 | 0.4873<br>90075 | -1.0368512<br>22 | 0.021<br>06  | .                                       | .                                                                                  |
| gene5<br>706  | 18.70612<br>763 | 38.52910<br>469 | 0.4855<br>06419 | -1.0424377<br>26 | 0.035<br>403 | .                                       | .                                                                                  |
| gene3<br>912  | 19.61234<br>743 | 40.46336<br>872 | 0.4846<br>93886 | -1.0448542<br>1  | 0.030<br>864 | .                                       | .                                                                                  |
| gene3<br>890  | 156.3884<br>642 | 322.6821<br>988 | 0.4846<br>51663 | -1.0449798<br>93 | 6.30E<br>-05 | gi 328790075 ref<br> XP_001120790.<br>2 | PREDICTED: laccase-1-like [Apis mellifera]                                         |
| gene1<br>2968 | 25.41525<br>625 | 52.58473<br>349 | 0.4833<br>20054 | -1.0489492<br>37 | 0.034<br>378 | gi 571578735 ref<br> XP_006572484.<br>1 | PREDICTED: uncharacterized protein LOC102655303 isoform X1 [Apis mellifera]        |

|               |                 |                 |                 |                  |              |                                         |                                                                                           |
|---------------|-----------------|-----------------|-----------------|------------------|--------------|-----------------------------------------|-------------------------------------------------------------------------------------------|
| gene4<br>877  | 22.29722<br>38  | 46.14229<br>002 | 0.4832<br>27508 | -1.0492255<br>13 | 0.026<br>667 | gi 571532839 ref<br> XP_006560106.<br>1 | PREDICTED: epidermal growth factor receptor-like, partial [Apis mellifera]                |
| gene1<br>43   | 102.1782<br>889 | 212.0880<br>153 | 0.4817<br>73045 | -1.0535744<br>18 | 0.024<br>064 | gi 571499603 ref<br> XP_006558614.<br>1 | PREDICTED: uncharacterized protein LOC102656689 isoform X1 [Apis mellifera]               |
| gene1<br>0626 | 1486.847<br>807 | 3104.263<br>423 | 0.4789<br>69599 | -1.0619940<br>07 | 0.000<br>576 | gi 571571446 ref<br> XP_006563114.<br>1 | PREDICTED: protein Malvolio isoform X1 [Apis mellifera]                                   |
| gene1<br>1412 | 24.68536<br>712 | 51.81603<br>494 | 0.4764<br>04016 | -1.0697425<br>21 | 0.023<br>582 | gi 94158832 ref<br>NP_001035315.<br>1   | odorant binding protein 9 precursor [Apis mellifera]                                      |
| gene8<br>912  | 57.81279<br>874 | 121.5300<br>99  | 0.4757<br>07658 | -1.0718528<br>45 | 0.002<br>858 | gi 571559390 ref<br> XP_006566381.<br>1 | PREDICTED: protein apterous isoform X1 [Apis mellifera]                                   |
| gene1<br>0238 | 18.60393<br>21  | 39.19115<br>654 | 0.4746<br>97195 | -1.0749205<br>69 | 0.019<br>753 | gi 48097975 ref<br>XP_393944.1          | PREDICTED: protein escargot [Apis mellifera]                                              |
| gene4<br>4    | 14.51937<br>393 | 30.76668<br>337 | 0.4719<br>18723 | -1.0833896<br>84 | 0.036<br>384 | .                                       | .                                                                                         |
| gene1<br>203  | 22.11475<br>152 | 47.02613<br>292 | 0.4702<br>65151 | -1.0884536<br>68 | 0.017<br>434 | .                                       | .                                                                                         |
| gene1<br>2060 | 88.13765<br>559 | 187.5772<br>372 | 0.4698<br>73941 | -1.0896543<br>38 | 0.011<br>911 | gi 571576451 ref<br> XP_006563160.<br>1 | PREDICTED: putative uncharacterized protein DDB_G0282133-like isoform X1 [Apis mellifera] |
| gene5<br>670  | 22.48889<br>572 | 47.90380<br>8   | 0.4694<br>59458 | -1.0909275<br>23 | 0.024<br>834 | gi 110757922 ref<br> XP_001122422.      | PREDICTED: uncharacterized protein LOC726699 isoform X1 [Apis mellifera]                  |

|               |                 |                 |                 |                  |              |                                         |                                                                                                   |
|---------------|-----------------|-----------------|-----------------|------------------|--------------|-----------------------------------------|---------------------------------------------------------------------------------------------------|
|               |                 |                 |                 |                  |              | 1                                       |                                                                                                   |
| gene9<br>765  | 43.17633<br>249 | 92.05866<br>312 | 0.4690<br>08902 | -1.0923127<br>9  | 0.005<br>313 | gi 571564846 ref<br> XP_006565269.<br>1 | PREDICTED: uncharacterized protein LOC102654968 [Apis mellifera]                                  |
| gene1<br>246  | 1152.300<br>995 | 2464.357<br>319 | 0.4675<br>86817 | -1.0966938<br>38 | 0.000<br>335 | gi 571508040 ref<br> XP_003251700.<br>2 | PREDICTED: uncharacterized protein LOC100576169 [Apis mellifera]                                  |
| gene3<br>488  | 98.75870<br>984 | 212.5422<br>38  | 0.4646<br>54512 | -1.1057696<br>78 | 0.002<br>537 | gi 571523231 ref<br> XP_006562047.<br>1 | PREDICTED: target of Myb protein 1-like isoform X1 [Apis mellifera]                               |
| gene5<br>937  | 78.09882<br>095 | 168.3762<br>846 | 0.4638<br>35041 | -1.1083162<br>79 | 0.049<br>596 | gi 571539358 ref<br> XP_006564362.<br>1 | PREDICTED: uncharacterized protein LOC102655685 isoform X1 [Apis mellifera]                       |
| gene6<br>609  | 11.62572<br>04  | 25.09526<br>828 | 0.4632<br>63444 | -1.1100952<br>52 | 0.047<br>049 | gi 571544547 ref<br> XP_006563926.<br>1 | PREDICTED: uncharacterized protein LOC413106 isoform X1 [Apis mellifera]                          |
| gene1<br>1968 | 136.4073<br>412 | 294.7759<br>828 | 0.4627<br>49169 | -1.1116976<br>95 | 0.000<br>352 | gi 571576379 ref<br> XP_396342.5        | PREDICTED: A disintegrin and metalloproteinase with thrombospondin motifs 3-like [Apis mellifera] |
| gene2<br>464  | 266.2319<br>138 | 578.9697<br>424 | 0.4598<br>37353 | -1.1208044<br>33 | 5.56E<br>-05 | gi 328789675 ref<br> XP_001122118.<br>2 | PREDICTED: bone morphogenetic protein 2-B isoform X1 [Apis mellifera]                             |
| gene1<br>469  | 28.56497<br>918 | 62.16860<br>434 | 0.4594<br>7596  | -1.1219387<br>13 | 0.013<br>205 | gi 572269672 ref<br> XP_006612850.<br>1 | PREDICTED: uncharacterized protein LOC102673414 [Apis dorsata]                                    |
| gene4<br>778  | 538.8726<br>037 | 1174.725<br>653 | 0.4587<br>22088 | -1.1243077<br>2  | 0.000<br>253 | gi 110757136 ref<br> XP_625175.2        | PREDICTED: ETS homologous factor-like [Apis mellifera]                                            |

|               |                 |                 |                 |                  |              |                                         |                                                                                      |
|---------------|-----------------|-----------------|-----------------|------------------|--------------|-----------------------------------------|--------------------------------------------------------------------------------------|
| gene5<br>776  | 193.0432<br>995 | 421.8704<br>516 | 0.4575<br>89051 | -1.1278755<br>63 | 0.001<br>873 | gi 571538195 ref<br> XP_006559876.<br>1 | PREDICTED: calcium release-activated calcium channel protein 1-like [Apis mellifera] |
| gene1<br>0110 | 115.2733<br>891 | 251.9724<br>688 | 0.4574<br>84064 | -1.1282066<br>05 | 5.94E<br>-05 | gi 571567206 ref<br> XP_006560128.<br>1 | PREDICTED: uncharacterized protein PF11_0207-like isoform X1 [Apis mellifera]        |
| gene6<br>235  | 147.0143<br>961 | 322.0994<br>285 | 0.4564<br>2551  | -1.1315486<br>66 | 3.31E<br>-06 | gi 571540827 ref<br> XP_394662.5        | PREDICTED: L-lactate dehydrogenase-like isoform X2 [Apis mellifera]                  |
| gene4<br>562  | 315.0313<br>134 | 694.1185<br>326 | 0.4538<br>58093 | -1.1396868<br>12 | 1.83E<br>-05 | gi 571530638 ref<br> XP_006567976.<br>1 | PREDICTED: uncharacterized protein LOC552512 isoform X1 [Apis mellifera]             |
| gene1<br>0057 | 89.85052<br>176 | 198.0327<br>334 | 0.4537<br>15506 | -1.1401401<br>31 | 0.003<br>738 | gi 571566871 ref<br> XP_006558588.<br>1 | PREDICTED: uncharacterized protein LOC102654964 isoform X1 [Apis mellifera]          |
| gene8<br>011  | 20.54973<br>671 | 45.29353<br>02  | 0.4537<br>0137  | -1.1401850<br>78 | 0.019<br>103 | gi 328784632 ref<br> XP_003250475.<br>1 | PREDICTED: pair-rule protein odd-paired-like [Apis mellifera]                        |
| gene1<br>229  | 6117.113<br>171 | 13512.03<br>818 | 0.4527<br>158   | -1.1433224<br>38 | 6.76E<br>-06 | gi 571507718 ref<br> XP_006571196.<br>1 | PREDICTED: nesprin-1-like [Apis mellifera]                                           |
| gene7<br>605  | 31.93808<br>152 | 71.44282<br>877 | 0.4470<br>4391  | -1.1615115<br>5  | 0.042<br>063 | gi 571550280 ref<br> XP_006567453.<br>1 | PREDICTED: peroxiredoxin 1-like [Apis mellifera]                                     |
| gene1<br>2207 | 44.56437<br>651 | 99.96281<br>422 | 0.4458<br>09543 | -1.1655005<br>96 | 0.036<br>532 | gi 571576963 ref<br> XP_006571904.<br>1 | PREDICTED: EKC/KEOPS complex subunit TPRKB-like [Apis mellifera]                     |



|               |                 |                 |                 |                  |              |                                         |                                                                                      |
|---------------|-----------------|-----------------|-----------------|------------------|--------------|-----------------------------------------|--------------------------------------------------------------------------------------|
| gene6<br>156  | 22.63864<br>399 | 50.86836<br>345 | 0.4450<br>43686 | -1.1679811<br>34 | 0.019<br>068 | gi 380018207 ref<br> XP_003693026.<br>1 | PREDICTED: GTP-binding protein REM 1 [Apis florea]                                   |
| gene3<br>255  | 741.7174<br>058 | 1670.296<br>402 | 0.4440<br>63344 | -1.1711626<br>08 | 0.007<br>496 | gi 571521844 ref<br> XP_006558248.<br>1 | PREDICTED: intracellular protein transport protein USO1-like [Apis mellifera]        |
| gene8<br>080  | 16.31159<br>921 | 36.91915<br>252 | 0.4418<br>19438 | -1.1784712<br>03 | 0.037<br>615 | .                                       | .                                                                                    |
| gene7<br>880  | 1031.128<br>389 | 2345.292<br>742 | 0.4396<br>58713 | -1.1855440<br>34 | 0.000<br>11  | gi 571552621 ref<br> XP_006562848.<br>1 | PREDICTED: mucin-2-like [Apis mellifera]                                             |
| gene1<br>1598 | 15.44117<br>847 | 35.38611<br>01  | 0.4363<br>62698 | -1.1964003<br>16 | 0.025<br>822 | .                                       | .                                                                                    |
| gene3<br>014  | 11.96588<br>059 | 27.51965<br>981 | 0.4348<br>12082 | -1.2015360<br>65 | 0.045<br>689 | .                                       | .                                                                                    |
| gene9<br>598  | 26.13841<br>47  | 60.21932<br>788 | 0.4340<br>53577 | -1.2040549<br>62 | 0.037<br>328 | gi 571563998 ref<br> XP_006561270.<br>1 | PREDICTED: protein penguin [Apis mellifera]                                          |
| gene7<br>059  | 100.8806<br>665 | 233.7943<br>605 | 0.4314<br>93156 | -1.2125904<br>18 | 0.004<br>964 | gi 571546747 ref<br> XP_006569833.<br>1 | PREDICTED: dynein beta chain, ciliary-like [Apis mellifera]                          |
| gene8<br>418  | 16.95482<br>65  | 39.39281<br>786 | 0.4304<br>04003 | -1.2162365<br>99 | 0.013<br>774 | .                                       | .                                                                                    |
| gene1<br>0783 | 1103.660<br>831 | 2576.024<br>9   | 0.4284<br>35622 | -1.2228496<br>57 | 0.000<br>468 | gi 571572211 ref<br> XP_006564974.<br>1 | PREDICTED: probable cation-transporting ATPase 13A3-like isoform X1 [Apis mellifera] |

|               |                 |                 |                 |                  |              |                                         |                                                                                                   |
|---------------|-----------------|-----------------|-----------------|------------------|--------------|-----------------------------------------|---------------------------------------------------------------------------------------------------|
| gene1<br>1710 | 23.18321<br>227 | 54.15541<br>765 | 0.4280<br>86667 | -1.2240251<br>91 | 0.006<br>229 | gi 571575429 ref<br> XP_006557360.<br>1 | PREDICTED: uncharacterized protein LOC102655415 [Apis mellifera]                                  |
| gene3<br>045  | 72.25783<br>656 | 169.2231<br>722 | 0.4269<br>97294 | -1.2277011<br>69 | 0.001<br>679 | gi 571520736 ref<br> XP_006568529.<br>1 | PREDICTED: protein tramtrack, alpha isoform-like isoform X7 [Apis mellifera]                      |
| gene4<br>905  | 308.6638<br>4   | 724.8615<br>703 | 0.4258<br>24533 | -1.2316690<br>23 | 0.001<br>088 | gi 571532896 ref<br> XP_006560793.<br>1 | PREDICTED: uncharacterized protein LOC102653609 [Apis mellifera]                                  |
| gene6<br>18   | 29.54960<br>964 | 69.80424<br>923 | 0.4233<br>21072 | -1.2401757<br>89 | 0.005<br>363 | .                                       | .                                                                                                 |
| gene4<br>647  | 74.77944<br>377 | 177.1245<br>188 | 0.4221<br>85727 | -1.2440502<br>88 | 0.000<br>812 | gi 571531318 ref<br> XP_006569990.<br>1 | PREDICTED: cytochrome b5-like [Apis mellifera]                                                    |
| gene1<br>0231 | 1651.657<br>061 | 3925.735<br>726 | 0.4207<br>25483 | -1.2490488<br>9  | 5.85E<br>-07 | gi 571568232 ref<br> XP_006562813.<br>1 | PREDICTED: uncharacterized protein LOC413596 isoform X1 [Apis mellifera]                          |
| gene8<br>480  | 178.8879<br>748 | 427.8545<br>885 | 0.4181<br>04608 | -1.2580641<br>53 | 0.003<br>556 | gi 571556476 ref<br> XP_006557488.<br>1 | PREDICTED: uncharacterized protein LOC100577693 [Apis mellifera]                                  |
| gene5<br>984  | 35.80179<br>73  | 85.87472<br>005 | 0.4169<br>07296 | -1.2622014<br>76 | 0.003<br>819 | gi 571540045 ref<br> XP_006565578.<br>1 | PREDICTED: discoidin domain-containing receptor 2-like [Apis mellifera]                           |
| gene2<br>691  | 1367.423<br>015 | 3283.304<br>882 | 0.4164<br>77624 | -1.2636891<br>09 | 0.000<br>206 | gi 571517921 ref<br> XP_394430.5        | PREDICTED: LOW QUALITY PROTEIN: sterile alpha and TIR motif-containing protein 1 [Apis mellifera] |
| gene1         | 221.9638        | 540.4771        | 0.4106          | -1.2839092       | 2.78E        | gi 328792883 ref                        | PREDICTED: uncharacterized protein LOC100577920 [Apis mellifera]                                  |

|               |                 |                 |                 |                  |              |                                     |                                                                             |
|---------------|-----------------|-----------------|-----------------|------------------|--------------|-------------------------------------|-----------------------------------------------------------------------------|
| 659           | 056             | 699             | 81187           | 35               | -06          | XP_003251794.1                      |                                                                             |
| gene6<br>514  | 247.8474<br>535 | 604.1695<br>905 | 0.4102<br>28282 | -1.2855011<br>35 | 0.006<br>187 | gi 571543280 ref<br> XP_006559685.1 | PREDICTED: spondin-1-like isoform X1 [Apis mellifera]                       |
| gene1<br>1908 | 20.95938<br>544 | 51.90638<br>989 | 0.4037<br>92009 | -1.3083157<br>36 | 0.005<br>155 | gi 571575979 ref<br> XP_006559456.1 | PREDICTED: cytosolic carboxypeptidase NnaD-like isoform X1 [Apis mellifera] |
| gene7<br>583  | 25.38256<br>627 | 62.87708<br>347 | 0.4036<br>8549  | -1.3086963<br>62 | 0.020<br>234 | gi 571550230 ref<br> XP_394770.5    | PREDICTED: protein fork head-like isoform 1 [Apis mellifera]                |
| gene8<br>076  | 27.32298<br>528 | 67.76251<br>681 | 0.4032<br>16801 | -1.3103723<br>4  | 0.006<br>192 | gi 571553830 ref<br> XP_006565605.1 | PREDICTED: paired box pox-meso protein isoform X1 [Apis mellifera]          |
| gene8<br>626  | 128.6299<br>188 | 322.4101<br>005 | 0.3989<br>63676 | -1.3256706<br>95 | 0.001<br>55  | gi 571557263 ref<br> XP_006558991.1 | PREDICTED: yellow-e3 isoform X1 [Apis mellifera]                            |
| gene5<br>985  | 464.6782<br>132 | 1164.947<br>414 | 0.3988<br>83424 | -1.3259609<br>23 | 9.84E<br>-05 | gi 328785804 ref<br> XP_003250660.1 | PREDICTED: uncharacterized protein LOC100578816 [Apis mellifera]            |
| gene1<br>2931 | 86.33212<br>53  | 217.4337<br>801 | 0.3970<br>50197 | -1.3326066<br>82 | 0.001<br>154 | gi 571539407 ref<br> XP_006564375.1 | PREDICTED: titin isoform X13 [Apis mellifera]                               |
| gene1<br>2730 | 1281.379<br>704 | 3243.389<br>993 | 0.3950<br>74199 | -1.3398044<br>63 | 0.001<br>478 | gi 571578283 ref<br> XP_006572347.1 | PREDICTED: laminin subunit alpha [Apis mellifera]                           |
| gene7         | 12.32697        | 31.35438        | 0.3931          | -1.3468481       | 0.023        | gi 571549449 ref                    | PREDICTED: putative uncharacterized protein DDB_G0271606-like [Apis         |

|               |                 |                 |                 |                  |              |                                 |                                                                                         |
|---------------|-----------------|-----------------|-----------------|------------------|--------------|---------------------------------|-----------------------------------------------------------------------------------------|
| 452           | 708             | 413             | 50031           | 28               | 757          | XP_006561867.1                  | mellifera]                                                                              |
| gene5<br>912  | 522.6240<br>462 | 1339.171<br>374 | 0.3902<br>59272 | -1.3574951<br>84 | 0.000<br>838 | gi 66512834 ref XP_395069.2     | PREDICTED: uridine phosphorylase 2-like isoform X2 [Apis mellifera]                     |
| gene1<br>0235 | 112.0288<br>382 | 287.6034<br>814 | 0.3895<br>2532  | -1.3602109<br>84 | 8.49E<br>-05 | gi 571579119 ref XP_003252014.2 | PREDICTED: uncharacterized protein LOC100578648, partial [Apis mellifera]               |
| gene1<br>0209 | 14.91728<br>6   | 38.77830<br>284 | 0.3846<br>8125  | -1.3782645<br>84 | 0.013<br>166 | gi 571568011 ref XP_006560472.1 | PREDICTED: neuroendocrine convertase 1-like [Apis mellifera]                            |
| gene6<br>695  | 46.15792<br>488 | 122.6017<br>594 | 0.3764<br>86643 | -1.4093294<br>11 | 0.000<br>564 | .                               | .                                                                                       |
| gene6<br>179  | 411.0725<br>185 | 1093.118<br>204 | 0.3760<br>54956 | -1.4109845<br>83 | 9.30E<br>-06 | gi 66512130 ref XP_623621.1     | PREDICTED: probable cytochrome P450 305a1 [Apis mellifera]                              |
| gene1<br>826  | 23.91336<br>19  | 64.47366<br>658 | 0.3709<br>01225 | -1.4308930<br>63 | 0.018<br>669 | .                               | .                                                                                       |
| gene1<br>0410 | 15.02233<br>01  | 41.38212<br>495 | 0.3630<br>14952 | -1.4618991<br>23 | 0.034<br>95  | gi 571569216 ref XP_006558826.1 | PREDICTED: dynein intermediate chain 3, ciliary-like [Apis mellifera]                   |
| gene1<br>2187 | 11.04152<br>201 | 30.83016<br>5   | 0.3581<br>40218 | -1.4814035<br>58 | 0.027<br>203 | gi 328792988 ref XP_001122709.2 | PREDICTED: endocuticle structural glycoprotein SgAbd-8-like isoform X1 [Apis mellifera] |
| gene7<br>444  | 62.74017<br>873 | 175.2635<br>379 | 0.3579<br>7622  | -1.4820643<br>42 | 0.012<br>542 | gi 571549427 ref XP_006561861.1 | PREDICTED: hydrocephalus-inducing protein-like [Apis mellifera]                         |
| gene9         | 146.1462        | 410.1990        | 0.3562          | -1.4889113       | 2.56E        | gi 328791431 ref                | PREDICTED: single Ig IL-1-related receptor-like [Apis mellifera]                        |

|               |                 |                 |                 |                  |              |                                         |                                                                                   |
|---------------|-----------------|-----------------|-----------------|------------------|--------------|-----------------------------------------|-----------------------------------------------------------------------------------|
| 381           | 518             | 559             | 81297           | 42               | -06          | XP_003251562.<br>1                      |                                                                                   |
| gene3<br>198  | 341.8965<br>932 | 961.0077<br>082 | 0.3557<br>68835 | -1.4909879<br>56 | 0.000<br>497 | gi 571521398 ref<br> XP_006569925.<br>1 | PREDICTED: LOW QUALITY PROTEIN: formin-like protein CG32138-like [Apis mellifera] |
| gene5<br>32   | 13.55184<br>871 | 38.42967<br>631 | 0.3526<br>40199 | -1.5037311<br>5  | 0.013<br>275 | gi 571502582 ref<br> XP_006565052.<br>1 | PREDICTED: glucose dehydrogenase [FAD, quinone] isoform X1 [Apis mellifera]       |
| gene1<br>0630 | 31.67407<br>249 | 90.26973<br>802 | 0.3508<br>82513 | -1.5109400<br>47 | 0.000<br>715 | gi 571571370 ref<br> XP_006563100.<br>1 | PREDICTED: zinc finger protein 423 isoform X1 [Apis mellifera]                    |
| gene6<br>153  | 13.16469<br>083 | 38.05631<br>945 | 0.3459<br>26538 | -1.5314624       | 0.029<br>13  | gi 571540063 ref<br> XP_006568339.<br>1 | PREDICTED: uncharacterized protein LOC100576948 isoform X1 [Apis mellifera]       |
| gene1<br>657  | 15.16134<br>121 | 44.70687<br>994 | 0.3391<br>27696 | -1.5600994<br>81 | 0.023<br>624 | gi 571510690 ref<br> XP_006571789.<br>1 | PREDICTED: uncharacterized protein LOC102655202 [Apis mellifera]                  |
| gene1<br>1355 | 32.67047<br>365 | 96.74080<br>887 | 0.3377<br>11396 | -1.5661372<br>3  | 7.90E<br>-05 | .                                       | .                                                                                 |
| gene1<br>3195 | 97.29592<br>46  | 288.6430<br>16  | 0.3370<br>80474 | -1.5688350<br>37 | 0.002<br>167 | gi 571579119 ref<br> XP_003252014.<br>2 | PREDICTED: uncharacterized protein LOC100578648, partial [Apis mellifera]         |
| gene1<br>0056 | 39.12225<br>584 | 118.7470<br>751 | 0.3294<br>5869  | -1.6018305<br>13 | 0.001<br>056 | gi 571566904 ref<br> XP_006558594.<br>1 | PREDICTED: uncharacterized protein LOC100577569 [Apis mellifera]                  |
| gene1         | 20.18070        | 62.18972        | 0.3245          | -1.6236999       | 0.000        | gi 571578992 ref                        | PREDICTED: A disintegrin and metalloproteinase with thrombospondin motifs         |

|               |                 |                 |                 |                  |              |                                         |                                                                                                |
|---------------|-----------------|-----------------|-----------------|------------------|--------------|-----------------------------------------|------------------------------------------------------------------------------------------------|
| 3120          | 058             | 55              | 02165           | 9                | 533          | XP_623804.2                             | 14-like isoform 1 [Apis mellifera]                                                             |
| gene2<br>834  | 126.1246<br>183 | 393.6529<br>704 | 0.3203<br>95444 | -1.6420744<br>62 | 0.010<br>328 | gi 571518900 ref<br> XP_006561027.<br>1 | PREDICTED: sterile alpha and TIR motif-containing protein 1-like, partial [Apis mellifera]     |
| gene7<br>174  | 16.21194<br>07  | 51.11779<br>043 | 0.3171<br>48698 | -1.6567686<br>73 | 0.006<br>201 | gi 48132776 ref<br>XP_396702.1          | PREDICTED: uncharacterized protein LOC413256 isoformX1 [Apis mellifera]                        |
| gene7<br>467  | 10.91426<br>458 | 34.58878<br>417 | 0.3155<br>43458 | -1.6640893<br>8  | 0.004<br>085 | .                                       | .                                                                                              |
| gene8<br>868  | 11.82150<br>09  | 37.83324<br>908 | 0.3124<br>63275 | -1.6782414<br>62 | 0.048<br>231 | gi 571559117 ref<br> XP_006566323.<br>1 | PREDICTED: uncharacterized protein LOC413109 [Apis mellifera]                                  |
| gene7<br>443  | 1603.344<br>513 | 5158.180<br>867 | 0.3108<br>35264 | -1.6857779<br>08 | 7.49E<br>-05 | gi 571549367 ref<br> XP_006561846.<br>1 | PREDICTED: fibroin heavy chain isoform X2 [Apis mellifera]                                     |
| gene1<br>880  | 13.21835<br>114 | 43.09203<br>928 | 0.3067<br>46939 | -1.7048791<br>48 | 0.003<br>037 | gi 571512020 ref<br> XP_006561218.<br>1 | PREDICTED: uncharacterized protein LOC725506 isoform X3 [Apis mellifera]                       |
| gene1<br>363  | 655.4129<br>007 | 2145.746<br>971 | 0.3054<br>47431 | -1.7110039<br>87 | 1.66E<br>-12 | gi 571508732 ref<br> XP_001120032.<br>3 | PREDICTED: kynurenine/alpha-aminoadipate aminotransferase, mitochondrial-like [Apis mellifera] |
| gene6<br>906  | 10.05559<br>751 | 33.44306<br>053 | 0.3006<br>78148 | -1.7337080<br>7  | 0.002<br>316 | gi 19570323 dbj<br>BAB86288.1           | mariner transposase [Apis cerana]                                                              |
| gene1<br>0169 | 17.99085<br>777 | 64.55634<br>557 | 0.2786<br>84576 | -1.8432949<br>39 | 0.000<br>567 | .                                       | .                                                                                              |
| gene2<br>80   | 13.24310<br>149 | 49.00560<br>397 | 0.2702<br>36471 | -1.8877057       | 0.015<br>052 | gi 571500862 ref<br> XP_006561982.      | PREDICTED: chaperone protein dnaJ 1, mitochondrial-like [Apis mellifera]                       |

|               |                 |                 |                 |                  |              |                                         |                                                                             |
|---------------|-----------------|-----------------|-----------------|------------------|--------------|-----------------------------------------|-----------------------------------------------------------------------------|
|               |                 |                 |                 |                  |              | 1                                       |                                                                             |
| gene1<br>0019 | 56.14144<br>579 | 246.8273<br>148 | 0.2274<br>52322 | -2.1363639<br>34 | 1.61E<br>-11 | gi 571566714 ref<br> XP_006558560.<br>1 | PREDICTED: cyclin-dependent kinase 6 isoform X1 [Apis mellifera]            |
| gene1<br>658  | 12.28225<br>59  | 59.08787<br>112 | 0.2078<br>64248 | -2.2662864<br>54 | 6.51E<br>-05 | gi 571510683 ref<br> XP_006571787.<br>1 | PREDICTED: uncharacterized protein LOC100577882 isoform X1 [Apis mellifera] |
| gene4<br>432  | 17.21091<br>291 | 86.88849<br>089 | 0.1980<br>80468 | -2.3358414<br>69 | 0.025<br>08  | gi 571529755 ref<br> XP_006567836.<br>1 | PREDICTED: uncharacterized protein LOC102653871 [Apis mellifera]            |
| gene4<br>929  | 13.41665<br>165 | 70.86385<br>448 | 0.1893<br>29973 | -2.4010252<br>72 | 6.97E<br>-05 | gi 328780665 ref<br> XP_003249840.<br>1 | PREDICTED: uncharacterized protein LOC100577819 [Apis mellifera]            |

Table S2. 22 down-regulated genes that related to the function of muscle Go term enriched in imidacloprid treatment groups

| Gene      | Putative function          | NR:Seq-id                       | NR:Description                                                                    |
|-----------|----------------------------|---------------------------------|-----------------------------------------------------------------------------------|
| gene6235  | somatic muscle development | gi 571540827 ref XP_394662.5    | PREDICTED: L-lactate dehydrogenase-like isoform X2 [Apis mellifera]               |
| gene10281 | muscle attachment          | gi 328785317 ref XP_001120437.2 | PREDICTED: integrin alpha-PS2 isoform X1 [Apis mellifera]                         |
| gene151   | muscle attachment          | gi 571500407 ref XP_006559949.1 | PREDICTED: protein muscleblind-like [Apis mellifera]                              |
| gene3021  | muscle attachment          | gi 571520122 ref XP_006568040.1 | PREDICTED: guanine nucleotide-releasing factor 2-like isoform X1 [Apis mellifera] |
| gene3362  | muscle attachment          | gi 571523080 ref XP_006560680.1 | PREDICTED: protein held out wings [Apis mellifera]                                |
| gene4877  | muscle attachment          | gi 571532839 ref XP_006560106.1 | PREDICTED: epidermal growth factor receptor-like, partial [Apis mellifera]        |
| gene13340 | microtubule related        | gi 328794317 ref XP_001123227.2 | PREDICTED: short spindle protein 4-like [Apis mellifera]                          |
| gene1601  | microtubule                | gi 571510304 ref XP_006571710.1 | PREDICTED: short spindle protein 4 isoform X1 [Apis mellifera]                    |
| gene10161 | actin binding              | gi 66522653 ref XP_391978.2     | PREDICTED: LIM domain-containing protein jub-like [Apis mellifera]                |
| gene10310 | actin binding              | gi 571568775 ref XP_006565137.1 | PREDICTED: talin-1-like [Apis mellifera]                                          |
| gene1229  | actin binding              | gi 571507718 ref XP_006571196.1 | PREDICTED: nesprin-1-like [Apis mellifera]                                        |
| gene12892 | actin binding              | gi 571578616 ref XP_006572452.1 | PREDICTED: filamin-A-like [Apis mellifera]                                        |
| gene1317  | actin binding              | gi 571508489 ref XP_006571351.1 | PREDICTED: actin-binding LIM protein 2-like isoform X2 [Apis mellifera]           |
| gene3198  | actin binding              | gi 571521398 ref XP_006569925.1 | PREDICTED: formin-like protein CG32138-like [Apis mellifera]                      |
| gene3829  | actin binding              | gi 334724440 ref NP_001229316.1 | PREDICTED: filamin-like [Apis mellifera]                                          |
| gene3884  | actin binding              | gi 571526129 ref XP_006569380.1 | PREDICTED: focal adhesion kinase 1 isoform X1 [Apis mellifera]                    |
| gene8492  | actin binding              | gi 571556561 ref XP_006557505.1 | PREDICTED: protein-methionine sulfoxide oxidase Mical isoform X1 [Apis mellifera] |
| gene1228  | titin-like                 | gi 571507693 ref XP_006571189.1 | PREDICTED: titin-like isoform X1 [Apis mellifera]                                 |
| gene12931 | titin-like                 | gi 571539407 ref XP_006564375.1 | PREDICTED: titin isoform X13 [Apis mellifera]                                     |
| gene5936  | titin-like                 | gi 571539411 ref XP_006564376.1 | PREDICTED: titin isoform X14 [Apis mellifera]                                     |
| gene7087  |                            | gi 571547082 ref XP_006569898.1 | PREDICTED: dentin sialophosphoprotein [Apis mellifera]                            |
| gene8280  |                            | gi 328786663 ref XP_001121883.2 | PREDICTED: trichohyalin isoform X1 [Apis mellifera]                               |



Table S3. 28 overexpressed ribosomal protein genes Go term enriched in imidacloprid treatment groups

| Gene      | NR:Seq-id                       | NR:Description                                               |
|-----------|---------------------------------|--------------------------------------------------------------|
| gene5792  | gi 307173970 gb EFN64700.1      | 40S ribosomal protein S15 [Camponotus floridanus]            |
| gene11955 | gi 571576123 ref XP_624943.3    | 40S ribosomal protein S7 [Apis mellifera]                    |
| gene10549 | gi 66524293 ref XP_393965.2     | 40S ribosomal protein SA [Apis mellifera]                    |
| gene4123  | gi 572272221 ref XP_006614024.1 | 40S ribosomal protein S11-like isoform X1 [Apis dorsata]     |
| gene3414  | gi 156554296 ref XP_001602465.1 | 40S ribosomal protein S14 [Nasonia vitripennis]              |
| gene292   | gi 350404704 ref XP_003487192.1 | 40S ribosomal protein S17 [Bombus impatiens]                 |
| gene13055 | gi 759079256 ref XP_011349442.1 | 40S ribosomal protein S19-like isoform X1 [Cerapachys biroi] |
| gene4229  | gi 645015869 ref XP_001601386.2 | 40S ribosomal protein S29 [Nasonia vitripennis]              |
| gene159   | gi 110767080 ref XP_001120419.1 | 40S ribosomal protein S6-like [Apis mellifera]               |
| gene7353  | gi 571547971 ref XP_006561561.1 | 40S ribosomal protein S8 isoform X1 [Apis mellifera]         |
| gene10910 | gi 110762954 ref XP_001121176.1 | 60S ribosomal protein L34 isoformX1 [Apis mellifera]         |
| gene7830  | gi 572268139 ref XP_006612127.1 | 60S acidic ribosomal protein P0-like [Apis dorsata]          |
| gene387   | gi 571501696 ref XP_006563278.1 | 60S ribosomal protein L10a [Apis mellifera]                  |
| gene12634 | gi 380023818 ref XP_003695708.1 | 60S ribosomal protein L12 [Apis florea]                      |
| gene12807 | gi 66552169 ref XP_625152.1     | 60S ribosomal protein L28 [Apis mellifera]                   |
| gene5872  | gi 383855926 ref XP_003703461.1 | 60S ribosomal protein L29-1 [Megachile rotundata]            |
| gene6926  | gi 48142237 ref XP_397314.1     | 60S ribosomal protein L31 isoform 2 [Apis mellifera]         |
| gene8822  | gi 380029575 ref XP_003698444.1 | 60S ribosomal protein L32 [Apis florea]                      |
| gene7324  | gi 571548748 ref XP_006561728.1 | 60S ribosomal protein L35a isoform X1 [Apis mellifera]       |
| gene2686  | gi 755959992 ref XP_011304587.1 | 60S ribosomal protein L37a [Fopius arisanus]                 |
| gene11421 | gi 66525285 ref XP_392071.2     | 60S ribosomal protein L4 isoform 1 [Apis mellifera]          |
| gene795   | gi 805784468 ref XP_003703131.2 | 60S ribosomal protein L9 [Megachile rotundata]               |
| gene8178  | gi 297591983 ref NP_001172073.1 | 60S acidic ribosomal protein P1 [Apis mellifera]             |

|           |                                 |                                                               |
|-----------|---------------------------------|---------------------------------------------------------------|
| gene10647 | gi 66551967 ref XP_624896.1     | 60S ribosomal protein L13 isoform 1 [Apis mellifera]          |
| gene10797 | gi 110762813 ref XP_625009.2    | 60S ribosomal protein L22 isoform 1 [Apis mellifera]          |
| gene11923 | gi 66526748 ref XP_624696.1     | 60S ribosomal protein L27a isoform X2 [Apis mellifera]        |
| gene3735  | gi 322788733 gb EFZ14326.1      | hypothetical protein SINV_15101, partial [Solenopsis invicta] |
| gene6373  | gi 292494904 ref NP_001167614.1 | ribosomal protein L35 [Apis mellifera]                        |

Table S4. Sequences of primers for the genes tested

| Gene Name | Gene ID-F(R) | Primers                | Product length (bp) |
|-----------|--------------|------------------------|---------------------|
| AADAT     | gene1363-F   | GCTCAATCGTATTCTCTGTCT  | 195                 |
|           | gene1363-R   | CTTTCACCTTTCTTTACCTTC  |                     |
| Cdk6      | gene10019-F  | GTTGCCTGAGAACACGATTG   | 192                 |
|           | gene10019-R  | TTCTGCCCGCTGTACTTCAT   |                     |
| RpS19     | gene13055-F  | CTACATTCGCAGCCCAATCG   | 117                 |
|           | gene13055-R  | GCCTTACGTGCAACACCACC   |                     |
| Syne1     | gene1229-F   | ATTGAGAACTTCCGTAATCGC  | 240                 |
|           | gene1229-R   | TGAACAGTAACATCCTGAGCCA |                     |
| RpL31     | gene6926-F   | AGTGCTATGAGCGAGGTTGTG  | 142                 |
|           | gene6926-R   | CATCTGGAGTTCCCATTTGTT  |                     |
| RpS7      | gene11955-F  | CTGGAATTGGAAATGAATAGCG | 128                 |
|           | gene11955-R  | GCCTTTAACTTTGGCATGGGTA |                     |
| Bmp7      | gene2464-F   | CAGAGGAAGGGATCAAACAGAT | 263                 |
|           | gene2464-R   | AAGCATGAAGTAAGGGACTG   |                     |
| RPL35     | gene6373-F   | CCTTTTTCCGTTGAAGAGGTAT | 138                 |
|           | gene6373-R   | ACTTTTGCCACTCGAAGATTTG |                     |
| SP28      | gene3689-F   | CTGTCTACCGTTCCAACACTCG | 126                 |

|                |            |                         |     |
|----------------|------------|-------------------------|-----|
|                | gene3689-R | AGCACGCTCACCGTAACTTTCT  |     |
| mapf           | gene2328-F | TTCTCTCTCCCTAACACCTTGC  | 145 |
|                | gene2328-R | AGATAAATTCGATCATCCCGTC  |     |
| $\beta$ -actin | actin-F    | TTGGTATGCCAACACTGTCCTTT | 120 |
|                | actin-R    | TGGCGCGATGATCTTAATTT    |     |
